# 1 Widespread introgression across a phylogeny of 155 *Drosophila* genomes

2  
3 Anton Suvorov<sup>1,\*,§</sup>, Bernard Y. Kim<sup>2</sup>, Jeremy Wang<sup>1</sup>, Ellie E. Armstrong<sup>2</sup>, David Peede<sup>3</sup>,  
4 Emmanuel R. R. D'Agostino<sup>3</sup>, Donald K. Price<sup>4</sup>, Peter Wadell<sup>5</sup>, Michael Lang<sup>6</sup>, Virginie  
5 Courtier-Orgogozo<sup>6</sup>, Jean R. David<sup>7,8</sup>, Dmitri Petrov<sup>2</sup>, Daniel R. Matute<sup>3,†,&</sup>, Daniel R.  
6 Schrider<sup>1,†,&</sup>, and Aaron A. Comeault<sup>9,†,&,\*</sup>

- 7  
8 1. Department of Genetics, University of North Carolina, Chapel Hill, North Carolina. USA  
9 2. Department of Biology, Stanford University, Stanford, CA, USA  
10 3. Department of Biology, University of North Carolina, Chapel Hill, North Carolina. USA  
11 4. School of Life Sciences, University of Nevada, Las Vegas. USA  
12 5. School of Fundamental Sciences, Massey University, Palmerston North. New Zealand  
13 6. CNRS, Institut Jacques Monod, Université de Paris. France  
14 7. Laboratoire Evolution, Génomes, Comportement, Ecologie (EGCE) CNRS, IRD, Univ.  
15 Paris-sud, Université Paris-Saclay, Gif sur Yvette, France  
16 8. Institut de Systématique, Evolution, Biodiversité, CNRS, MNHN, UPMC, EPHE,  
17 Muséum National d'Histoire Naturelle, Sorbonne Universités, Paris, France  
18 9. School of Natural Sciences, Bangor University, Bangor, Gwynedd, LL57 2DGA, UK

19 <sup>§</sup>Lead Contact

20 \*Correspondence: [anton.suvorov@med.unc.edu](mailto:anton.suvorov@med.unc.edu) and [a.comeault@bangor.ac.uk](mailto:a.comeault@bangor.ac.uk)

21 <sup>†</sup>These authors contributed equally to this work.

22 <sup>&</sup>Senior authors

## 23 24 25 ABSTRACT

26  
27 Genome-scale sequence data have invigorated the study of hybridization and introgression,  
28 particularly in animals. However, outside of a few notable cases, we lack systematic tests for  
29 introgression at a larger phylogenetic scale across entire clades. Here we leverage 155 genome  
30 assemblies, from 149 species, to generate a fossil-calibrated phylogeny and conduct multilocus  
31 tests for introgression across nine monophyletic radiations within the genus *Drosophila*. Using  
32 complementary phylogenomic approaches, we identify widespread introgression across the  
33 evolutionary history of *Drosophila*. Mapping gene-tree discordance onto the phylogeny revealed  
34 that both ancient and recent introgression has occurred across most of the nine clades that we  
35 examined. Our results provide the first evidence of introgression occurring across the evolutionary  
36 history of *Drosophila* and highlight the need to continue to study the evolutionary consequences  
37 of hybridization and introgression in this genus and across the Tree of Life.  
38

## 39 INTRODUCTION

40 The extent of gene exchange in nature has remained one of the most hotly debated  
41 questions in speciation genetics. Genomic data have revealed that introgression is common  
42 across taxa, having been identified in major groups such as fungi<sup>1-3</sup>, vertebrates<sup>4-7</sup>, insects<sup>8-10</sup>,  
43 and angiosperms<sup>11,12</sup>. The evolutionary effects of introgression are diverse, and are determined  
44 by multiple ecological and genomic factors<sup>13,14</sup>. Once thought to be strictly deleterious, it has  
45 become increasingly clear that introgression can serve as a source of genetic variation used  
46 during local adaptation<sup>15,16</sup> and adaptive radiation<sup>17,18</sup>. While our understanding of introgression  
47 as a widespread phenomenon has clearly improved, it remains unclear how often it occurs across  
48 taxa. Ideally, determining the frequency of introgression across the Tree of Life would leverage  
49 the signal from systematic analyses of clade-level genomic data without an *a priori* selection of  
50 taxa known to hybridize in nature.

51 At the phylogenetic scale, hybridization has typically been explored at relatively recent  
52 timescales. For example, studies of hybridization between cats (Felidae; 10-12 My; ~40  
53 species<sup>19</sup>), butterflies (*Heliconius*; 10-15 My; 15 species<sup>8</sup>), cichlid fishes from the African rift  
54 lakes (0.5-10 My; ~27 species<sup>18,20,21</sup>), and wild tomatoes (*Solanum*; ~4 My; ~20 species<sup>12</sup>) all  
55 rejected a purely bifurcating phylogenetic history. In each of these systems introgression has  
56 occurred relatively recently, as the common ancestor for each species group occurred no more  
57 than 15 million years ago. However, there are also notable exceptions, and evidence for  
58 introgression has been found across much deeper phylogenetic timescales within vascular  
59 plants<sup>11</sup> and primates<sup>7</sup>. In some species, there is also evidence that introgression has been a  
60 source of adaptive genetic variation that has helped drive adaptation (e.g. refs. 2,22-25). These  
61 results show how introgression has both (1) occurred in disparate taxonomic groups and (2)  
62 promoted adaptation and diversification in some. Notwithstanding key examples<sup>4-7,11,12</sup>, we still  
63 require systematic tests of introgression that use clade-level genomic data that spans both deep  
64 and shallow phylogenetic time to better understand introgression's generality throughout  
65 evolution.

66 Species from the genus *Drosophila* remain one of the most powerful genetic systems to  
67 study animal evolution. Comparative analyses suggest that introgression might be common  
68 during speciation in the genus<sup>26</sup>. Genome scans of closely related drosophilid species have  
69 provided evidence of gene flow and introgression<sup>9,10,27-32</sup>. There is also evidence of

70 contemporary hybridization<sup>33–35</sup> and stable hybrid zones between a handful of species<sup>36–38</sup>. These  
71 examples of hybridization and introgression show that species boundaries can be porous but  
72 cannot be taken as *prima facie* evidence of the commonality of introgression. We still lack a  
73 systematic understanding of the relative frequency of hybridization and subsequent introgression  
74 across *Drosophila*. Here we analyze patterns of introgression across a phylogeny generated using  
75 155 whole genomes derived from 149 species of *Drosophila*, and the genomes of four outgroup  
76 species. These *Drosophila* species span over 50 million years of evolution and include multiple  
77 samples from nine major radiations within the genus *Drosophila*. We used two different  
78 phylogenetic approaches to test whether introgression has occurred in each of these nine  
79 radiations. We found numerous instances of introgression across the evolutionary history of  
80 drosophilid flies, some mapping to early divergences within clades up to 20–25 Mya. Our results  
81 provide a taxonomically unbiased estimate of the prevalence of introgression at a  
82 macroevolutionary scale. Despite few known observations of current hybridization in nature,  
83 introgression appears to be a widespread phenomenon across the phylogeny of *Drosophila*.

84

## 85 RESULTS

### 86 A high-confidence phylogeny of 155 *Drosophila* genomes

87 We first used genome-scale sequence data to infer phylogenetic relationships among  
88 species in our data set. To achieve this, we annotated and generated multiple sequence  
89 alignments for 2,791 Benchmarking Universal Single-Copy Orthologs (BUSCOs; v3<sup>39,40</sup>) across  
90 155 independently assembled *Drosophila* genomes together with four outgroups (3 additional  
91 species from Drosophilidae and *Anopheles gambiae*). We used these alignments, totalling  
92 8,187,056 nucleotide positions, and fossil calibrations to reconstruct a fossil-calibrated tree of  
93 *Drosophila* evolutionary history. Note that the inclusion of *Anopheles* as an outgroup allowed us  
94 to include a fossil of *Grauvogelia*, the oldest known dipteran, in our fossil calibration analysis,  
95 along with several *Drosophilidae* fossils and/or geological information (i.e., formation of the  
96 Hawaiian Islands; Data S1).

97 Our phylogenetic analyses (see Method Details for details) using both maximum-  
98 likelihood (ML using the IQ-TREE package) and gene tree coalescent-based (ASTRAL)  
99 approaches with DNA data revealed well-supported relationships among nearly all species  
100 within our dataset. Phylogenies inferred using these two approaches only differed in three

101 relationships (Figure S1): (i) *D. villosipedis* was either recovered as sister species to *D. limitata*  
102 + *D. ochracea* (ML topology) or as a sister to *D. limitata* + *D. ochracea* + *D. murphyi* + *D.*  
103 *sproati* (ASTRAL topology); (ii) *D. vulcana* and *D. seguyi* form monophyletic lineage sister to  
104 the *D. nikananu* + *D. spp. aff. chauvacae* + *D. burlai* + *D. bocqueti* + *D. bakoue* clade (ML  
105 topology) or have paraphyletic relationships where *D. vulcana* is sister to the *D. nikananu* + *D.*  
106 *spp. aff. chauvacae* + *D. burlai* + *D. bocqueti* + *D. bakoue* clade (ASTRAL topology) ; (iii) *D.*  
107 *simulans* was recovered as sister either to *D. mauritiana* (ML topology) or *D. sechellia*  
108 (ASTRAL topology, the latter of which is perhaps more likely to be the true species tree  
109 according to an analysis examining low-recombining regions, which are less prone to ILS<sup>41</sup>. The  
110 nodal supports were consistently high across both ML (Ultrafast bootstrap (UFBoot) = 100, an  
111 approximate likelihood ratio test with the nonparametric Shimodaira–Hasegawa correction (SH-  
112 aLRT) = 100, a Bayesian-like transformation of aLRT (aBayes) = 1) and ASTRAL (Local  
113 posterior probability (LPP) = 1) topologies with the exception of *D. limitata* + *D. ochracea* + *D.*  
114 *villosipedis* (UFBoot = 9, SH-aLRT = 81, aBayes = 1) and *D. carrolli* + *D. rhopaloa* + *D.*  
115 *kurseongensis* (UFBoot = 81.2, SH-aLRT = 81, aBayes = 1) on the ML tree, and *D. limitata* + *D.*  
116 *ochracea* + *D. murphyi* + *D. sproati* (LPP = 0.97) and *D. sulfugaster bilimbata* + *D. sulfugaster*  
117 *sulfurigeraster* (LPP = 0.69) on the ASTRAL tree. Thus, the phylogeny we report here is the first  
118 of the genus *Drosophila* with almost all nodes resolved with high confidence—recent estimates  
119 of the *Drosophila* phylogeny lacked strong support throughout all tree depth levels<sup>42–44</sup>.

120 Erroneous orthology inference as well as misalignment can impede accurate phylogenetic  
121 inference and create artificially long branches<sup>45</sup>. Repeating our ASTRAL analysis after removing  
122 outlier long branches via TreeShrink<sup>45</sup> resulted in an identical tree topology with the  
123 aforementioned ASTRAL tree (Figure S1). Furthermore, an ML topology estimated from the  
124 dataset with more closely related outgroup species (see Method Details) results in an identical  
125 topology with the aforementioned ML tree (Figure S1). The inferred phylogeny from the protein  
126 supermatrix showed only four incongruencies with the phylogeny that was inferred from DNA  
127 data (Figure S1): (i) *D. villosipedis* was recovered as a sister species to *D. limitata* + *D. ochracea*  
128 + *D. murphyi* + *D. sproati*; (ii) *D. watanabei* + *D. punjabiensis* is sister to the clade containing  
129 *D. bakoue* and *D. jambulina*; (iii) *D. vulcana* and *D. seguyi* show paraphyletic relationships; (iv)  
130 *Z. vittiger* and *Z. lachaisei* show sister species relationships. We performed further assessment of  
131 nodal support with Quartet Sampling<sup>11</sup>, using the Quartet Concordance (QC) and Quartet

132 Differential (QD) scores to identify quartet-tree species-tree discordance (Method Details). At  
133 some nodes, an appreciable fraction of quartets disagreed with our inferred species tree topology  
134 ( $QC < 1$ ), and in most of these cases this discordance was skewed toward one of the two possible  
135 alternative topologies (i.e.  $QD < 1$  but  $> 0$ ) as is consistent with introgression. We formally  
136 explore this pattern below.

137 In order to estimate divergence times across the *Drosophila* phylogeny, we developed  
138 five calibration schemes (A, B, C, D and “Russo”; Data S1) used in MCMCTree<sup>46</sup> and one  
139 scheme based on the Fossilized Birth-Death (FBD) process<sup>47</sup> used in BEAST2<sup>48</sup> (BEAST2 FBD;  
140 Data S1). Overall, four of the five MCMCTree schemes yielded nearly identical age estimates  
141 with narrow 95 % credible intervals (CI), whereas scheme “Russo” (a fossil calibration strategy  
142 closely matching that from<sup>43</sup>) showed slightly older estimates (Figure S2) with notably wider  
143 95% CIs. Throughout this manuscript we use the time estimates obtained with scheme A. This  
144 calibration analysis estimated that extant members of the genus *Drosophila* branched off from  
145 the other Drosophilidae (*Leucophenga*, *Scaptodrosophila* and *Chymomyza*) ~53 Mya (95% CI:  
146 50 - 56.6 Mya) during the Eocene Epoch of the Paleogene Period (Figure 1). The same analysis  
147 inferred that the split between the two major lineages within *Drosophila*—the subgenera of  
148 *Sophophora* and *Drosophila*—occurred ~47 Mya (95% CI: 43.9- 49.9 Mya; Figure 1; “A” and  
149 “B” clades, respectively); previously published estimates of this time include ~32 Mya (95% CI:  
150 25–40 Mya<sup>49</sup>), ~63 Mya (95% CI: 39–87 Mya<sup>50</sup>), and ~56 Mya (95% CI not available<sup>43</sup>). We  
151 also note that our divergence time estimates of the *Drosophila* subgenus (~34 Mya, 95% CI: 31.6  
152 - 36.8 Mya; clades 6 through 9) are somewhat younger than ~40 Mya, a previous estimate  
153 reported in<sup>51</sup>, although the latter had fairly wide confidence intervals (95% CI: 33.4 - 47.6 Mya).  
154 On the other hand, divergence time estimates produced by the FBD scheme in BEAST2 tend to  
155 be older especially for deeper nodes (Figure S2). Also, CIs estimated by BEAST2 were wider  
156 than those from MCMCTREE. This can be explained by the fewer assumptions about fossil  
157 calibration placement and age prior specification for methods that rely on the FBD process.  
158 Additionally, we note that not all parameters of the BEAST2 FBD calibration scheme converged  
159 (i.e., effective sample size  $< 100$ ) even after  $6 \times 10^8$  MCMC generations. Thus, the lack of a  
160 thorough fossil record within *Drosophila* makes it difficult to accurately and precisely estimate  
161 divergence times, and point estimates of divergence times should be interpreted with caution.

162

163

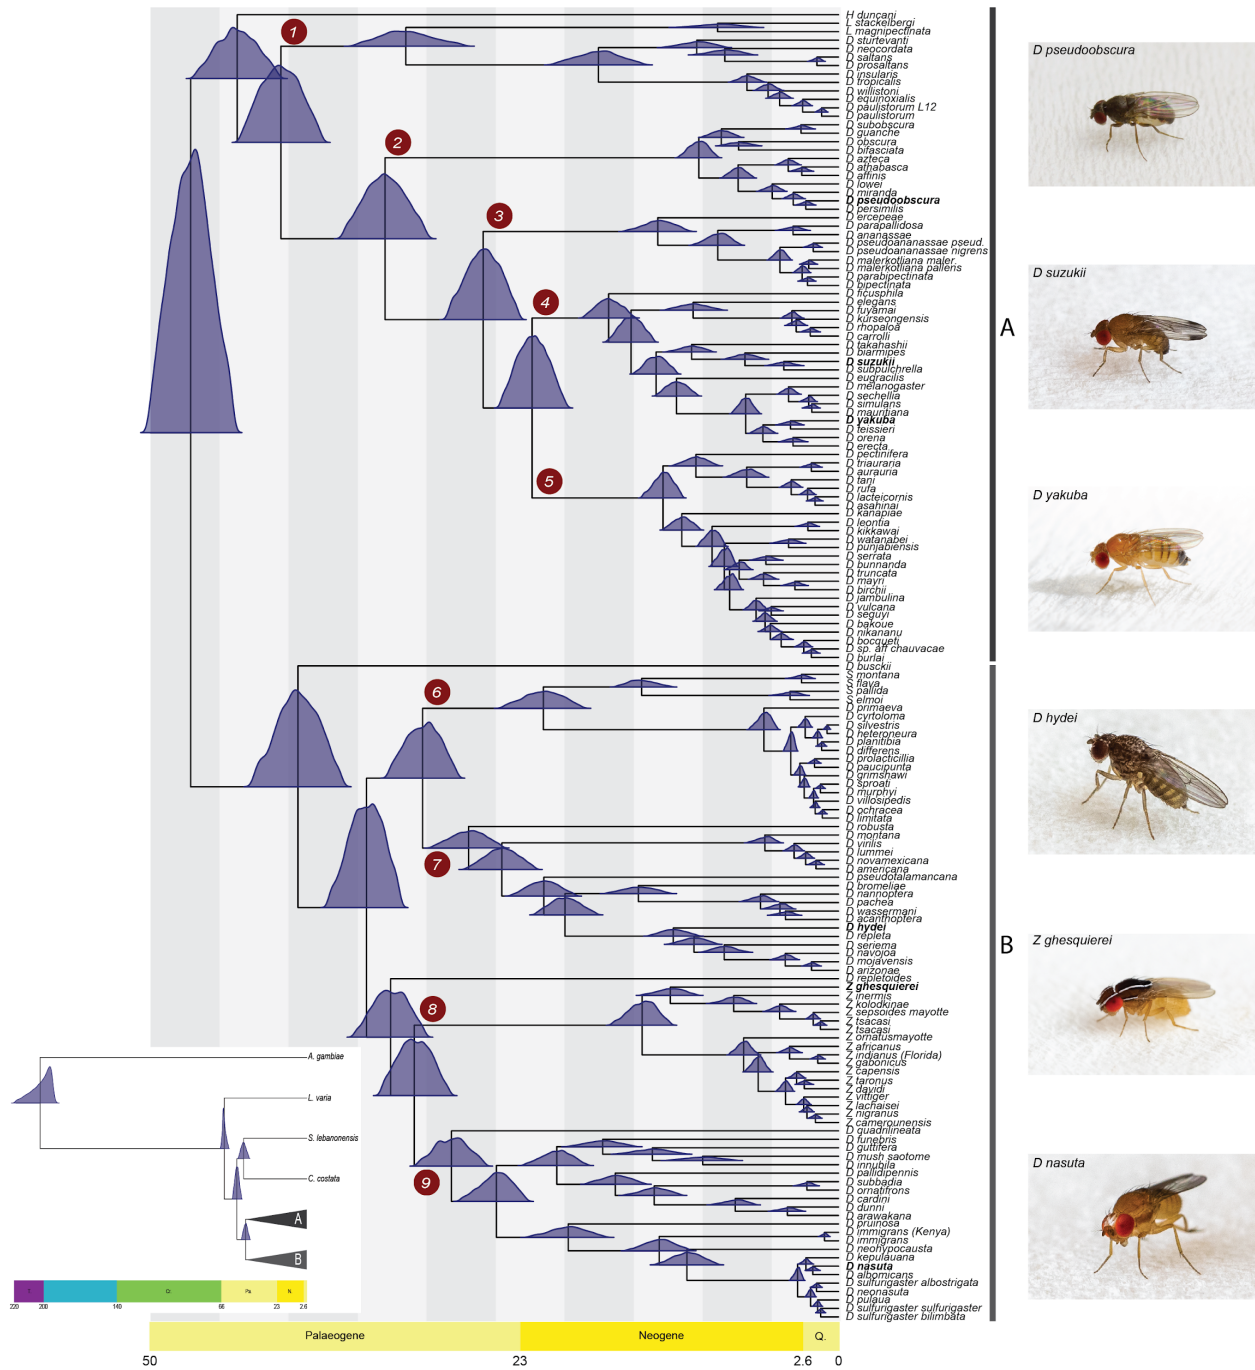

164

165 **Figure 1.** Fossil calibrated maximum likelihood phylogenetic tree of the genus *Drosophila* inferred from a  
 166 supermatrix of 2,791 BUSCO loci (total of 8,187,056 sites). The blue distributions at each divergence point on the  
 167 tree represent nodal age posterior probabilities from MCMCTree. *Grauvogelia* and *Oligophryne* fossils were used to  
 168 set priors on the age of the root of the tree, *Phytomyzites* and *Electrophortica succini* were used for priors for the  
 169 root of the *Drosophilidae* family, and *Electrophortica succini* and *Scaptomyza dominicana* were used to set priors  
 170 for the crown group “*Scaptomyza*”, i.e. Most Recent Common Ancestor (MRCA) node of the *Scaptomyza* species  
 171 (scheme A; Data S1). The numbered red circles denote clades for which analyses of introgression were performed.  
 172 Inset: the phylogenetic and temporal relationships between our distant outgroup *Anopheles gambiae*, more closely

173 related outgroup species of Drosophilidae (*Leucophenga varia*, *Scaptodrosophila lebanonensis* and *Chymomyza*  
174 *costata*), and the *Drosophila* genus. A and B denote the two inferred major groups within *Drosophila*.

175

## 176 **Widespread signatures of introgression across the *Drosophila* phylogeny**

177 To assess the prevalence of introgression across the *Drosophila* tree, we subdivided  
178 species into nine monophyletic lineages (herein referred to as clades 1 through 9; Figure 1) and  
179 tested for introgression within each clade. These clades correspond to the deepest divergences  
180 within the genus, with most having an MRCA during the Paleogene. Clades 4 and 5 are the two  
181 exceptions, splitting from an MRCA later in the Neogene. Within each of the nine clades, the  
182 MRCA of all sampled genomes ranged from ~10 Mya (Figure 1; clade 2) to ~32 Mya (Figure 1;  
183 clade 1). We note that *Hirtodrosophila duncani*, *Drosophila busckii* and *Drosophila repletoides*  
184 were not included in these clade assignments as each of these species was the only sampled  
185 descendent of a deep lineage; additional taxon sampling is required to assign them to specific  
186 monophyletic species groups that could be tested for introgression.

187 We tested for introgression within each of these nine clades using two complementary  
188 phylogenomic methods that rely on the counts of gene trees inferred from the BUSCO loci that  
189 are discordant with the inferred trees (hereafter referred to as the discordant-count test or DCT)  
190 and the distribution of branch lengths for discordant gene trees (hereafter termed the branch-  
191 length test or BLT), respectively, among rooted triplets of taxa (Figure 2). These methods  
192 leverage information contained across a set of gene trees to differentiate patterns of discordance  
193 that are consistent with introgression from those that can be explained by incomplete lineage  
194 sorting alone (see Method Details). We found at least one pair of species with evidence of  
195 introgression in 7 of the 9 clades according to both DCT and BLT (i.e. the same pair of species  
196 showed evidence for introgression that was significant for both tests in the same triplet at an  
197 FDR-corrected  $P$ -value threshold of 0.05). In clades 1 and 3 there were no species pairs for  
198 which the DCT and BLT were significant in the same triplet and both suggest the same  
199 introgressing species pair (Data S2). However, both clades had several pairs that were significant  
200 according to one test or the other (Data S2). We found even stronger support for introgression  
201 using two existing software methods: QuIBL (Data S2), which examines the branch-length  
202 distributions of all three gene tree topologies for a triplet<sup>8</sup>, and HyDe (Data S2), which tests for  
203 introgression by counting quartet site patterns<sup>52</sup>. Specifically, QuIBL detected introgression in  
204 120 of 152 (78.9%) of species pairs detected by both DCT and BLT, as well as 894 additional

205 species pairs not detected by DCT-BLT; we note that BLT and QuIBL approaches are not fully  
 206 independent, since they both utilize branch-length information. Similarly, HyDe detected  
 207 introgression in 142 of 152 (93.4%) of species pairs detected by both DCT and BLT, and 898  
 208 additional species pairs (the results of HyDe were not qualitatively affected if a more distantly  
 209 related outgroup, i.e. *Anopheles gambiae*, was selected, see Data S2). However, we focus here on  
 210 the intersection between DCT and BLT methods (after correcting each for multiple testing), as  
 211 this provides a more conservative estimate of the extent of introgression. Supporting this claim,  
 212 we applied these tests to a gene tree dataset simulated under high levels of ILS<sup>53</sup> and observed  
 213 low false positive rates: 0.054 for DCT, 0.089 for BLT, and 0.009 for their intersection.

214

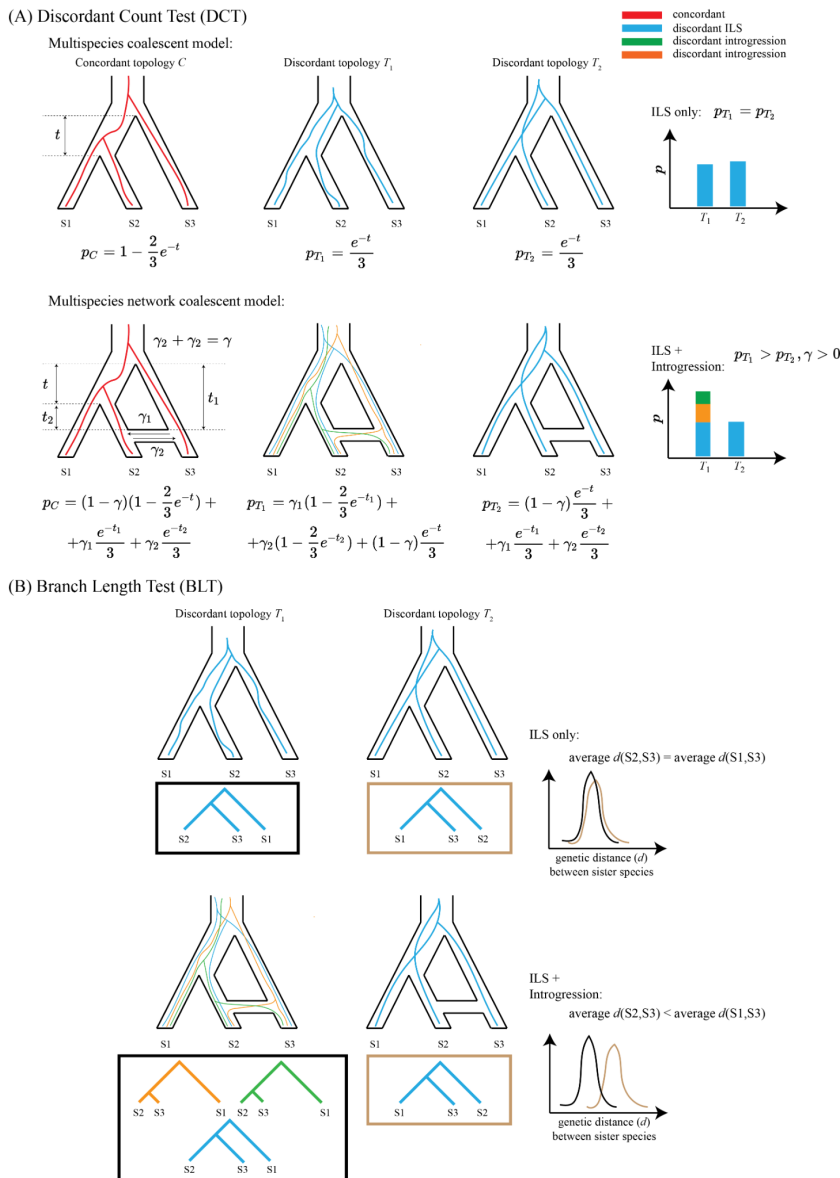

**Figure 2.** Overview of the phylogenomic approaches used to detect introgression. (A) The Discordant Count Test (DCT) identifies introgression where a given triplet within the tree shows an excess of gene trees that support one of the two possible divergent topologies. Note that concordant gene trees and corresponding probabilities are included for completeness, although these are not used by our test. (B) The Branch Length Test (BLT) identifies introgression where branch lengths of gene trees that support introgression are shorter than branch lengths of those that support the species tree and the less frequent divergent topology (i.e., the discordant topology putatively due to ILS).



2

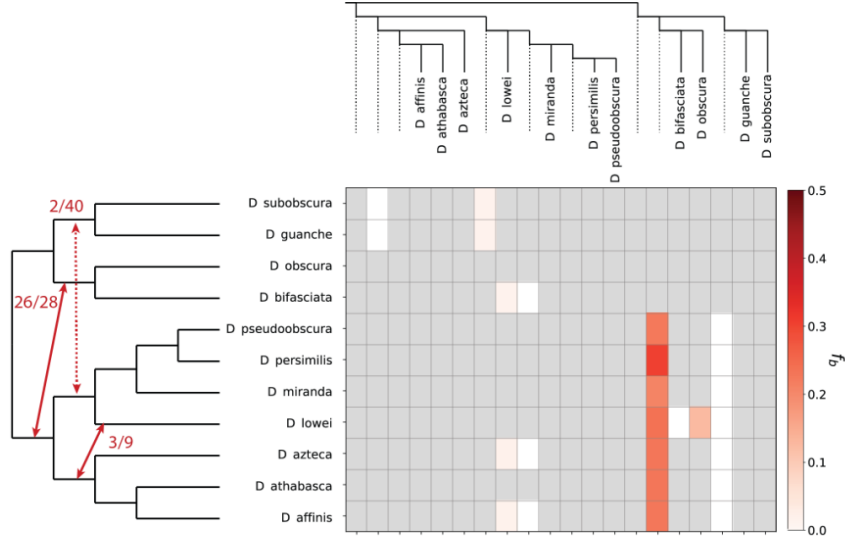

7

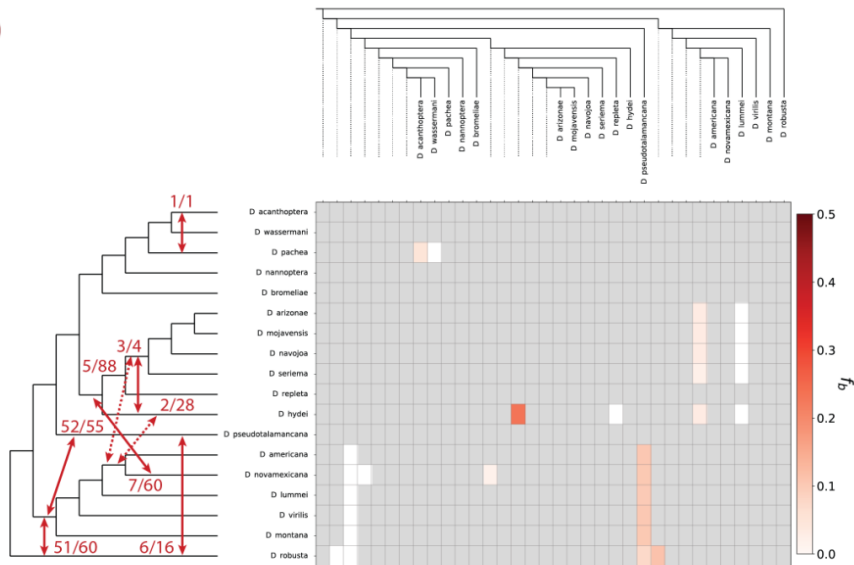

9

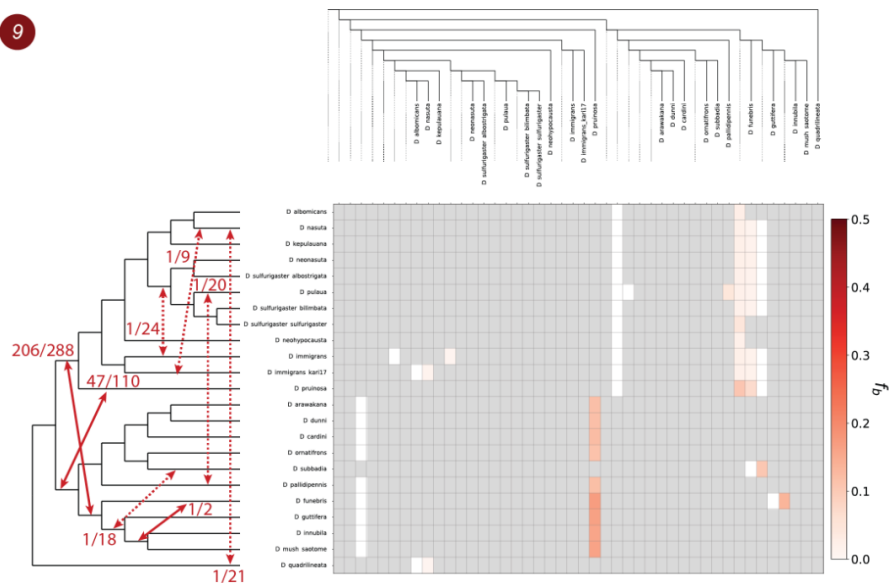

236 **Figure 3.** Patterns of introgression inferred for the monophyletic clades 2, 7 and 9. The matrix shows inferred  
237 introgression proportions as estimated from gene tree counts for the introgressed species pairs (Method Details), and  
238 then mapped to internal branches using the  $f$ -branch method<sup>20</sup>. The expanded tree at the top of each matrix shows  
239 both the terminal as well as ancestral branches. The tree on the left side of each matrix represents species  
240 relationships with mapped introgression events (red arrows) derived from the corresponding  $f$ -branch matrix  
241 (Method Details). The fractions next to each arrow represent the number of triplets that support a specific  
242 introgression event by both DCT and BLT divided by the total number of triplets that could have detected the  
243 introgression event. Dashed arrows represent introgression events with low support (triplet support ratio < 10%).  
244

245  
246 We carried out several analyses to assess the robustness of our results to data quality and  
247 evolutionary rate. First, to assess the effect of alignment length we performed BLT and DCT  
248 analyses on gene trees that excluded alignments with fewer than 1,000 sites. We found that ~  
249 84%, ~94% and ~80% of introgressing species pairs that were identified by BLT, DCT, and  
250 their intersection, respectively, remained significant after filtering out these short alignments  
251 (Data S2). Second, we explored whether the rapid karyotype evolution<sup>54</sup> observed in the *obscura*  
252 group (our clade 2) may impact introgression inference. To that end, we excluded loci that did  
253 not belong to the same Muller element within each analyzed triplet by BLT and DCT. This  
254 filtering scheme had a minor impact on introgression estimation with ~70%, ~89% and ~76%  
255 introgressing taxon pairs identified by BLT, DCT and their intersection being identified after  
256 filtering out loci that are found on different Muller elements in species within this clade (Data  
257 S2). More importantly, this filtering had no impact on the introgression events discussed below  
258 and shown in Figure 2—the exact same events were inferred for clade 2. Third, we investigated  
259 the effects of evolutionary rate (as measured by  $d_N/d_S$ ) heterogeneity across branches on  
260 introgression inference. For each triplet tested by BLT and DCT we excluded gene trees with  
261  $d_N/d_S > 0.53$ , which corresponds to the 5% critical value of  $d_N/d_S$  distribution across all the  
262 clades and gene trees. Overall, ~69%, ~82% and ~54% of our original number of introgressing  
263 taxon pairs were identified after  $d_N/d_S$  filtering by the BLT, DCT and their intersection,  
264 respectively (Data S2). Importantly, a large number of genes are removed when applying this  
265 filter because only one branch within the portion of the gene tree relevant to the triplet must  
266 exceed the critical value of  $d_N/d_S$  to result in the entire gene tree's removal. We therefore asked  
267 to what extent this reduced fraction of introgressing taxon pairs is a consequence of reduced

268 power due to the reduction in the number of gene trees. We found that randomly subsampling  
269 gene trees without respect to  $d_N/d_S$  value can affect introgression inferences in a similar fashion:  
270 on average ~76% , ~85% and ~65% introgressing taxon pairs were identified by BLT, DCT and  
271 their intersection, respectively, after randomly removing the same number of genes removed by  
272 our  $d_N/d_S$  filter (see Method Details). Thus, although we don't rule out the possibility that  
273 evolutionary rate heterogeneity may influence our DCT-BLT analysis, or that the persistence of  
274 introgressed alleles may be correlated with a gene's evolutionary rate, this result shows that our  
275 estimates of gene flow are not being driven primarily by genes evolving under the least amount  
276 of selective constraint and/or the greatest amount of positive selection. We also repeated our  
277 BLT and DCT analyses using a gene tree set with potentially misaligned sequences removed via  
278 `TreeShrink` and obtained results largely concordant with other methods as shown in Data S2.  
279 However, we notice several exceptions: in clades 5 and 7 the number of species pairs with at  
280 least one triplet that is significant according to both the DCT and BLT methods is markedly  
281 higher after running `TreeShrink`, largely due to an increase in significant DCT results. In  
282 addition, for Hawaiian drosophilids (clade 6) we find no introgression based on the overlap  
283 between BLT and DCT.

284         The number of species pairs that show evidence of introgression in our initial DCT-BLT  
285 analysis is not equivalent to the number of independent introgression events among *Drosophila*  
286 species. This is because gene flow in the distant past can leave evidence of introgression in  
287 multiple contemporary species pairs. For example, we found evidence for introgression between  
288 *D. robusta* and all five species within the *D. americana*-*D. montana* group (see clade 7 in Figure  
289 3). Rather than five independent instances of introgression between species, this pattern could  
290 reflect introgression between ancestral taxa that subsequently diverged into the contemporary  
291 species. More generally, cases where multiple introgressing species pairs each shared the same  
292 MRCA may be more parsimoniously explained by a single ancestral introgression event between  
293 the branches that coalesce at this node, while those involving only a single species pair may have  
294 resulted from introgression between the extant species pair (Data S2). Another example of the  
295 former can be seen in clade 6 where the evidence suggests introgression occurred between the  
296 Hawaiian *Scaptomyza* and *Drosophila* (Figure S3) that are estimated to have diverged from each  
297 other more than 20 Mya. This ancient introgression may have occurred prior to the formation of

298 Kauai island ~5 Mya which is now the oldest high island with extant species in these two  
299 groups<sup>55,56</sup>.

300 To summarize our DCT-BLT results and estimate both the number of introgression  
301 events and the proportion of the genome that introgressed during those events ( $\gamma$ ) we adapted the  
302  $f$ -branch heuristic<sup>20</sup> (implemented in `Dsuite`<sup>57</sup>; Method Details). Summed across all clades, our  
303  $f$ -branch results suggest that at least 30 introgression events are required to explain our DCT-  
304 BLT results (Figure 3 and Figure S2). Clades 2, 4, 6, 7 and 9 showed the strongest evidence of  
305 introgression, in terms of both the total number of DCT-BLT significant triplets and  $\gamma$  estimates  
306 from `Dsuite` that support those events (Table 1). For example, in clade 2 `Dsuite` suggests an  
307 ancestral introgression event between the branch leading to *D. obscura* and *D. bifasciata* and the  
308 branch that leads to the clade containing *D. pseudoobscura* and *D. affinis*. Furthermore, this  
309 particular signal is characterized by a large fraction of introgressed genetic material ( $\gamma = 0.237$ ,  
310 Table 1) and by the large number of triplets that are significant according to both DCT and BLT  
311 (26 out of 28 total triplets that could detect this event are significant according to both tests). We  
312 stress that both our methods used to detect introgression (DCT and BLT) and our approaches for  
313 counting introgression events ( $f$ -branch) are conservative, and thus the true number of events  
314 could be substantially greater, as suggested by our analyses using QuIBL and HyDe. Regardless  
315 of the method used, careful examination of results in Data S2, Figure 3 and Figure S2 reveals  
316 that deep introgression events are clearly the best explanation for some of our patterns (e.g. the  
317 case from clade 7 involving *D. robusta* described above), although more recent events may have  
318 occurred as well (e.g. between *D. pachea* and *D. acanthoptera*; Data S2, clade 7).

319 We note that some scenarios of ancestral population structure could potentially result in  
320 differences in the number and branch lengths of gene trees with either discordant topology  
321 (discussed in Method Details). We therefore applied a more stringent version of the DCT-BLT  
322 that compares the branch lengths of the discordant topology with those of the concordant  
323 topology; this test will not be sensitive to ancestral population structure but could potentially  
324 produce many false negatives (Method Details). When applying this more stringent branch-  
325 length test to our data set, we find that of the 511 triplets significant according to our combined  
326 DCT-BLT test, 144 (28.1%) remain significant when imposing this much more stringent version  
327 of the BLT (again, after FDR correction). We then asked how many of the 30 introgression  
328 events shown in Figs. 3 and S3 were significant by this more stringent test for at least one triplet,

329 finding that 13 of the 30 events (43.3%) are significant, including 11/17 (64.7%) of the most  
 330 strongly supported events (those significant in at least 10% of triplets in our original analysis and  
 331 shown in solid lines in Figs. 3 and S3). This result shows that the majority (~2/3) of our strongly  
 332 supported putative introgression events are inconsistent with the phenomenon of ancestral  
 333 population structure-produced false positives. Given that this test is highly conservative, we  
 334 interpret this result as evidence that the vast majority of our detected introgression events are true  
 335 positives rather than artifacts of population structure.

336 To complement our *f*-branch analysis, we also used PhyloNet<sup>58,59</sup> to identify branches  
 337 with the strongest signature of introgression in each of the nine monophyletic clades in our tree.  
 338 Within each clade, we examined all possible network topologies produced by adding a single  
 339 reticulation event to the species tree and determined which of the resulting phylogenetic  
 340 networks produced the best likelihood score. We note that networks with more reticulation  
 341 events would most likely exhibit a better fit to observed patterns of introgression but the  
 342 biological interpretation of complex networks with multiple reticulations is more challenging;  
 343 thus, we limited the analysis to a single reticulation event even though this will produce false  
 344 negatives in clades with multiple gene flow events.

| Clade | Introgression Event                                                                        | Triplet ratio (significant/total) | Average $\gamma$ | CI lower and upper bounds of lineage duration (Mya) |
|-------|--------------------------------------------------------------------------------------------|-----------------------------------|------------------|-----------------------------------------------------|
| 2     | <i>D. obscura</i> ... <i>D. bifasciata</i> ↔ <i>D. pseudoobscura</i> ... <i>D. affinis</i> | 26/28                             | 0.237            | 9.84-5.9, 11.53-6.18                                |
|       | <i>D. subobscura</i> ... <i>D. guanche</i> ↔ <i>D. pseudoobscura</i> ... <i>D. lowei</i>   | 2/40                              | 0.016            | 9.84-1.93, 8.39-3.94                                |
|       | <i>D. lowei</i> ↔ <i>D. azteca</i> ... <i>D. affinis</i>                                   | 3/9                               | 0.019            | 5.77-0, 8.39-2.88                                   |
| 4     | <i>D. ficusphila</i> ↔ <i>D. carrolli</i> ... <i>D. elegans</i>                            | 5/81                              | 0.049            | 18.46-0, 16.72-8.55                                 |
|       | <i>D. ficusphila</i> ↔ <i>D. erecta</i> ... <i>D. eugracilis</i>                           | 19/65                             | 0.035            | 18.46-0, 14.77-10.3                                 |
|       | <i>D. erecta</i> ... <i>D. orena</i> ↔ <i>D. mauritiana</i> ... <i>D. melanogaster</i>     | 4/16                              | 0.044            | 6.38-2.45, 7.71-2.92                                |
| 5     | <i>D. leontia</i> ↔ <i>D. birchii</i> ... <i>D. serrata</i>                                | 1/55                              | 0.076            | 3.07-0, 8.84-6.4*                                   |

|          |                                                                                             |         |       |                        |
|----------|---------------------------------------------------------------------------------------------|---------|-------|------------------------|
| <b>6</b> | <i>S. pallida</i> ↔ <i>D. cyrtoloma</i> ... <i>D. primaeva</i>                              | 13/42   | 0.03  | 4.9-0, 24.22-4.52      |
|          | <i>S. flava</i> ... <i>S. montana</i> ↔ <i>D. cyrtoloma</i> ... <i>D. prolacticillia</i>    | 25/56   | 0.032 | 16.14-1.87/6.56-3.05   |
|          | <i>D. primaeva</i> ↔ <i>D. cyrtoloma</i> ... <i>D. silvestris</i>                           | 1/40    | 0.02  | 6.56-0/3.96-2          |
|          | <i>D. heteroneura</i> ↔ <i>D. grimshawi</i> ... <i>D. sproati</i>                           | 1/36    | 0.021 | 1.1-0/3.22-2.17*       |
|          | <i>D. primaeva</i> ↔ <i>D. prolacticillia</i>                                               | 1/12    | 0.012 | 6.56-0/2.16-0          |
| <b>7</b> | <i>D. robusta</i> ↔ <i>D. americana</i> ... <i>D. montana</i>                               | 49/60   | 0.113 | 29.36-0/26.88-4.28     |
|          | <i>D. pseudotalamancana</i> ↔ <i>D. americana</i> ... <i>D. montana</i>                     | 52/55   | 0.103 | 23.56-0/26.88-4.28     |
|          | <i>D. novamexicana</i> ↔ <i>D. arizonae</i> ... <i>D. hydei</i>                             | 7/60    | 0.019 | 2.99-0/23.56-10.24     |
|          | <i>D. americana</i> ... <i>D. novamexicana</i> ↔ <i>D. arizonae</i> ... <i>D. seriema</i>   | 5/88    | 0.031 | 2.99-1.17/12.23-6.71*  |
|          | <i>D. hydei</i> ↔ <i>D. americana</i> ... <i>D. novamexicana</i>                            | 2/28    | 0.034 | 13.82-0/2.99-1.17      |
|          | <i>D. hydei</i> ↔ <i>D. arizonae</i> ... <i>D. seriema</i>                                  | 3/4     | 0.234 | 13.82-0/12.23-6.71     |
|          | <i>D. robusta</i> ↔ <i>D. pseudotalamancana</i>                                             | 6/16    | 0.076 | 29.36-0/23.56-0        |
|          | <i>D. pachea</i> ↔ <i>D. acanthoptera</i>                                                   | 1/1     | 0.05  | 5.36-0/4.95-0          |
| <b>8</b> | <i>Z. camerounensis</i> ↔ <i>Z. lachaisei</i>                                               | 1/1     | 0.051 | 2.13-0/2.76-0          |
|          | <i>Z. camerounensis</i> ↔ <i>Z. vittiger</i>                                                | 1/2     | 0.06  | 2.13-0/3-0             |
| <b>9</b> | <i>D. pruinosa</i> ↔ <i>D. arawakana</i> ... <i>D. mush sãotomé</i>                         | 47/110  | 0.138 | 22.41-0/27.26-18.21    |
|          | <i>D. funebris</i> ... <i>D. mush sãotomé</i> ↔ <i>D. albomicans</i> ... <i>D. pruinosa</i> | 206/288 | 0.031 | 22.7-14.74/27.26-16.86 |
|          | <i>D. subbadia</i> ↔ <i>D. guttifera</i> ... <i>D. mush sãotomé</i>                         | 1/18    | 0.106 | 3.19-0/19.51-11.12*    |

|                                                                                     |      |       |                    |
|-------------------------------------------------------------------------------------|------|-------|--------------------|
| <i>D. innubila</i> ... <i>D. mush sãotomé</i> ↔ <i>D. funebris</i>                  | 1/2  | 0.135 | 15.94-7.48/19.51-0 |
| <i>D. immigrans</i> ↔ <i>D. neonasuta</i> ... <i>D. sulfurigaster sulfurigaster</i> | 1/24 | 0.01  | 1.44-0/3.5-1.7*    |
| <i>D. immigrans (kari17)</i> ↔ <i>D. nasuta</i>                                     | 1/9  | 0.013 | 1.44-0/2.38-0      |
| <i>D. pallidipennis</i> ↔ <i>D. pulaua</i>                                          | 1/20 | 0.045 | 18.35-0/1.86-0     |
| <i>D. quadrilineata</i> ↔ <i>D. nasuta</i>                                          | 1/21 | 0.01  | 30.52-0/2.38-0     |

345 **Table 1.** Placements, support and timing of introgression events across the *Drosophila* phylogeny. Putative  
 346 introgression events (↔) are specified between different clades indicated by the pair of species in that clade with the  
 347 oldest MRCA. The triplet ratio shows the number of significant and non-significant triplets according to DCT-BLT.  
 348 The average  $\gamma$  was obtained from the  $f$ -branch results. The durations of the two introgressing lineages are  
 349 represented by predicted lower and upper boundaries of credible intervals (95% CIs) estimated by MCMCTree using  
 350 calibration scheme A. \* indicates introgressing lineages with no time overlap (according to 95% CIs).

351

352 For all clades except clade 8, the networks with the highest likelihood scores from  
 353 PhyloNet qualitatively agree with the inferred introgression patterns by the DCT-BLT results  
 354 summarized by `Dsuite`: the best-supported position of a reticulation event inferred by  
 355 PhyloNet tended to occur in the same or similar locations on the tree as introgression events we  
 356 inferred with our DCT-BLT analysis (Figure S4). On the other hand, PhyloNet inferred an  
 357 introgression event in clade 8 that is more ancient than that inferred by DCT-BLT (an  
 358 introgression event between *Z. capensis* and the *Z. camerounensis*-*Z. nigranus* ancestor detected  
 359 by DCT-BLT is pushed back to the *Z. camerounensis*-*Z. vittiger* ancestor by PhyloNet).  
 360 Uncertainty over the precise history of introgression in clade 8 notwithstanding, PhyloNet is  
 361 consistent with our DCT-BCT analysis and identifies introgression across the *Drosophila*  
 362 phylogeny.

363 Finally, we asked whether the proportion of the genome that introgressed between  
 364 putatively introgressing taxa ( $\gamma$ ) varied with the timing of introgression events (Figure 4). Rather  
 365 than timing introgression relative to when two hybridizing taxa shared a most recent common  
 366 ancestor (which would require additional data, such as haplotype lengths of introgressed  
 367 regions), we leveraged divergence time estimates across the *drosophila* phylogeny (Figure 1) and

368 estimated when introgression events could have occurred in time relative to the present (i.e.,  
369 Mya). For this analysis, we focused on the 17 “best-supported” introgression events based on  
370 the criteria that more than 10% of the total triplets that could detect introgression between a  
371 given pair of taxa were significant according to both DCT and BLT (see solid red arrows in Figs.  
372 3 and S3; Table 1). We estimated when these events occurred by taking the maximum,  
373 minimum, and midpoint times when the two branches that experienced introgression both  
374 coexisted in our dated phylogeny. We note that this approach results in imprecise time estimates,  
375 particularly for long branches in the phylogeny; however, it allowed us to test whether there was  
376 any obvious relationship between the proportion of the genome that introgressed ( $\gamma$ ) and when  
377 those introgression events took place in the past. In one instance, the two branches that putatively  
378 experienced introgression did not overlap in time in our phylogeny. This situation could be  
379 explained by “ghost” introgression with unsampled or extinct lineages. For the 17 remaining  
380 introgression events, there was not a significant relationship between the midpoint estimate of  
381 timing of introgression (Mya) and  $\gamma$  (Spearman’s rank correlation: 0.43;  $P = 0.085$ ; Figure 4).  
382 Our analyses therefore support introgression across the evolutionary history of *Drosophila*, with  
383 introgressing species pairs exchanging a similar fraction of the genome (range of average  $\gamma$   
384 estimates = 0.013 - 0.237) regardless of whether those events were ancient or more recent.  
385



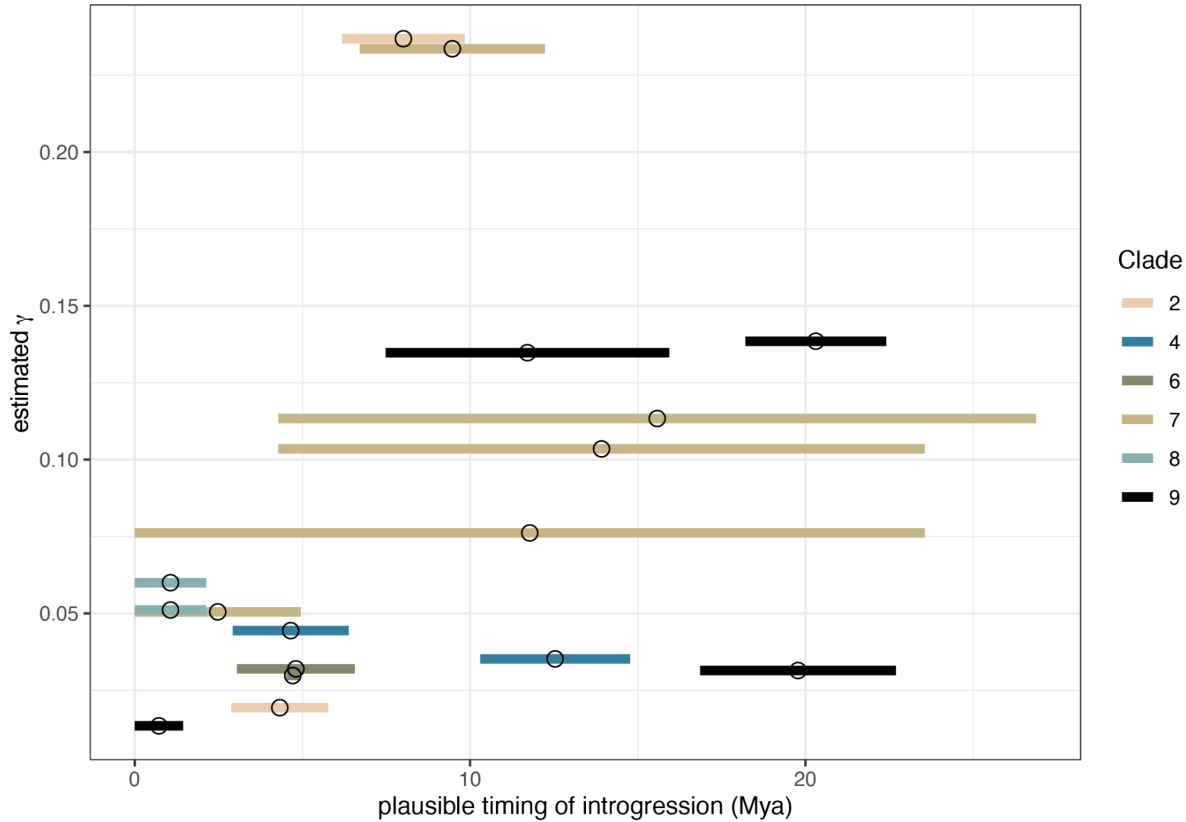

386

387 **Figure 4.** Time and fraction of the genome introgressing for the 17 best-supported introgression events across the  
388 *Drosophila* phylogeny. Each horizontal segment summarises one of the 17 introgression events highlighted in  
389 Figure 3 and is colored by clade. Segments span the times when the two putatively introgressing taxa both existed  
390 and are based on times inferred from the dating analysis summarised in Figure 1. Fraction of the genome that  
391 introgressed was estimated as the average f-branch statistic across all triplet comparisons that supported a given  
392 introgression event. Mya = million years ago.

393

## 394 Discussion

### 395 A time-calibrated tree of drosophilid evolution

396 *Drosophila*, as a genus, remains a premier model in genetics, ecology, and evolutionary  
397 biology. With over 1,600 species<sup>42</sup>, the genus has the potential to reveal why some groups are  
398 more speciose than others. Yet the phylogenetic relationships among the main groups in the  
399 genus have remained largely unresolved (reviewed in <sup>42</sup>). Here we estimated a robust time-  
400 calibrated phylogeny for the whole genus using multilocus genomic data and calibrated it using a  
401 fossil record.

402 Our results confirm that the genus *Drosophila* is paraphyletic, with the genera *Zaprionus*,  
403 *Scaptomyza*, *Leucophenga*, and *Hirtodrosophila* each nested within the larger genus *Drosophila*.

404 Consistent with the subdivisions previously proposed by refs. 60 and 44, clades 1-5 of our  
405 phylogeny contain species belonging to the subgenus *Sophophora*, and include species from the  
406 genus *Lordiphosa* (group A in Figure 1). Clades 6-9 of our phylogeny contain species belonging  
407 to the subgenus *Drosophila* (group B in Figure 1) and include species from the Hawaiian  
408 *Drosophila* and the subgenera *Siphlodora*, *Phloridosa* (synonymized with the subgenus  
409 *Drosophila*<sup>44</sup>, and genus *Zaprionus*. For more recent radiations within *Drosophila*, the topology  
410 we present is largely congruent with previous studies<sup>42,51</sup> but two general observations are  
411 notable. First, our results confirm that *Lordiphosa* is closely related to the *saltans* and *willistoni*  
412 groups (clade 1) and part of the *Sophophora* subgenus (consistent with ref. <sup>61</sup>). Second, we  
413 confirm that *Zaprionus* is related to the *cardini/qunaria/immigrans* group (consistent with refs.  
414 42 and 60, but discordant with 43). Despite our well resolved phylogeny, comparisons with other  
415 studies emphasize the need to expand species sampling, especially given the potential to generate  
416 highly contiguous genomes at relatively low cost<sup>62</sup>.

417 Our results from divergence time analysis via MCMCTree suggest that the origin of  
418 *Drosophila* (including the subgenera *Sophophora* (group A) and *Drosophila* (group B)) occurred  
419 during the Eocene Epoch of the Paleogene, which is younger than estimates by <sup>60</sup> and <sup>43</sup>, but  
420 older than estimates by <sup>49</sup>. Different estimates of divergence times may be the result of different  
421 calibration information used, such as mutation rates, the time of formation of the Hawaiian  
422 Islands, and the fossil record. However, our comparison of various calibration schemes suggests  
423 that the choice of calibration information has a minor effect on MCMCTree's age estimation  
424 (Figure S2). Additionally, credible intervals around our estimates tend to be notably narrower  
425 than in all of the aforementioned studies. In contrast to the previous studies, we used genome-  
426 scale multilocus data which would be expected to improve both the accuracy and precision of  
427 age estimates<sup>63,64</sup>.

428 On the other hand, we note that our analyses in BEAST2 using the FBD model yielded  
429 significantly older ages (Figure S2) especially for deeper nodes and with markedly wider  
430 credible intervals suggesting origination of *Drosophila* lineage in the Late Cretaceous. These  
431 calibration inconsistencies may arise as a result of the poor fossil record within *Drosophila* (only  
432 *Scaptomyza dominicana* from Dominican amber) and selection of the oldest fossils for deeper  
433 radiations, which together can lead to overestimation of nodal ages under the FBD model<sup>65</sup>.

434 Moreover, the poor convergence behavior we observed would also be expected to produce larger  
435 credible intervals.

436

### 437 **The extent of introgression in *Drosophila***

438 Access to genome-scale data has reinvigorated the study of hybridization and  
439 introgression<sup>14</sup>. We used genome-scale sequence data to provide the first systematic survey of  
440 introgression across the phylogeny of drosophilid flies. Our complementary—and  
441 conservative—approaches identified overlapping evidence for introgression within seven of the  
442 nine clades we analyzed (Figs. 3 and S3, Data S2). We conclude that at least 30 pairs of lineages  
443 have experienced introgression across *Drosophila*'s history (Table 1), though we note that other  
444 methods recover more introgression events (Data S2) and thus we cannot rule out the possibility  
445 that the true number is substantially higher. Moreover, we find that in many cases a substantial  
446 fraction of the genome is introgressed: our estimates indicate that numerous introgression events  
447 have altered gene tree topologies for >10% of the genome (Figs. 3 and S3, Table 1). Studies in  
448 contemporary *Drosophila* species suggest that selection may constrain the evolution of mixed  
449 ancestry, at least in naturally occurring<sup>9,36,66</sup> and experimental admixed populations<sup>67,68</sup>. The  
450 results we have presented here used phylogenetic signals to show that introgression has  
451 nonetheless occurred and left a detectable signal within the genomes of many extant *Drosophila*.

452 In addition to providing an estimate of the extent of introgression, our results are  
453 informative about the timing of introgression among *Drosophila* lineages: the approaches we  
454 used to estimate the number of introgression events, and map them onto the phylogeny could  
455 potentially overestimate the timing of introgression if multiple independent more recent events  
456 are mistaken for one ancestral event. However, as described in the Results, both our PhyloNet  
457 analyses and a careful examination of our DCT-BLT results are most consistent with ancient  
458 introgression events in many cases. We also find evidence for very recent events, and although  
459 our analyses did not search for gene flow between sister taxa, previous studies of closely related  
460 species in *Drosophila* have revealed evidence of introgression<sup>9,10,29,31,32</sup>. Studies that have taken  
461 phylogenomic approaches to detect introgression in other taxa have also reported evidence for  
462 introgression between both “ancient” lineages (i.e., those that predate speciation events  
463 generating extant species) and extant species<sup>8,12,18,19,21</sup>. We conclude that introgression between  
464 *Drosophila* flies has similarly occurred throughout their evolutionary history.

465           Although the signal of introgression across our phylogeny provides evidence for  
466 widespread introgression in *Drosophila*, the evolutionary role of introgressed alleles remains to  
467 be tested. For example, the impact of hybridization and introgression on evolution can be  
468 diverse, from redistributing adaptive genetic variation<sup>23,69,70</sup> to generating negative epistasis  
469 between alleles that have evolved in different genomic backgrounds (refs. 71–73; reviewed in  
470 refs. 15,16,74,75). The number of introgressed alleles that remain in a hybrid lineage depends on  
471 their selection coefficients<sup>76–78</sup>, their location in the genome (i.e., sex chromosomes vs.  
472 autosomes<sup>79–81</sup>), levels of divergence between the hybridizing species<sup>9,82,83</sup>, and recombination  
473 rates among loci<sup>6,84</sup>. Previous studies have, for example, shown that *Drosophila* hybrids often  
474 show maladaptive phenotypes<sup>36,85–89</sup>. Similarly, experimental hybrid swarms generated from two  
475 independent species pairs of *Drosophila* have shown that these populations can evolve to  
476 represent only one of their two parental species within as few as 10 generations, with the genome  
477 of one of their two parental species being rapidly purged from the populations<sup>67</sup>. These results  
478 show how hybrid *Drosophila* can be less fit than their parents, and further work is needed to  
479 determine the evolutionary effects, and the ecological context, of the introgression that we report  
480 here. However, our results suggest that not all introgressed material is deleterious in *Drosophila*,  
481 as we find that for some lineages a large fraction of the genome is introgressed (i.e. our  $\gamma$   
482 estimates shown in Figs. 3 and S3 and Table 1). These results add to the growing body of  
483 literature that document a detectable phylogenetic signal of introgression left within the genomes  
484 of a wide range of species radiations that include *Drosophila*, other dipterans<sup>90</sup>,  
485 lepidopterans<sup>8,84,91</sup>, humans<sup>5,92,93</sup>, fungi<sup>1,2</sup>, and angiosperm plants<sup>11,12</sup>.

486

### 487 **Caveats and future directions**

488           We estimated the number of events required to explain the introgression patterns across  
489 the tree and in some cases those events were recovered as relatively ancient. However, our  
490 approaches for mapping gene flow events onto the phylogeny was somewhat parsimonious in  
491 that it favors older events over repeated and recent introgressions (see Method Details), and thus  
492 may bias the age of introgression towards ancient events and underestimate the true number of  
493 pairs of lineages that have exchanged genetic material. For example, introgression events we  
494 inferred at deeper nodes in our phylogeny are often supported by only a subset of comparisons  
495 between species pairs that spanned those nodes (e.g. see “ancient” introgression events in clades

496 2, 7 and 9; Figure 3). It is also possible that some patterns we observe reflect scenarios where  
497 introgressed segments have persisted along some lineages but been purged along others. This  
498 phenomenon could also cause older gene flow between sister lineages, which should generally be  
499 undetectable according to the BLT and DCT methods, to instead appear as introgression between  
500 non-sister lineages that our methods can detect. Future work could seek to more precisely reveal  
501 the number and timing of gene flow events across this phylogeny, including more recent  
502 introgression events and gene flow between extant and extinct/unsampled lineages, a pattern  
503 referred to as “ghost” introgression<sup>94,95</sup>.

504 Our analyses also do not identify the precise alleles that have crossed species boundaries  
505 or reveal the manner in which these alleles may have affected fitness in the recipient  
506 population<sup>74,75</sup>. Genome alignments, complete annotations, and/or population level sampling  
507 across the genus are required to determine whether certain genes or functional categories of  
508 genes are more likely to cross species boundaries than others. More complete taxonomic  
509 sampling, combined with methodological advances for inferring the number and timing of  
510 introgression events in large phylogenies, will increase our ability to identify the specific timing  
511 and consequences of introgression across *Drosophila*.

512

## 513 **Conclusions**

514 Speciation research has moved away from the debate of whether speciation can occur  
515 with gene flow to more quantitative tests of how much introgression occurs in nature, and how  
516 this introgression affects the fitness of individuals in the recipient population. Our well-resolved  
517 phylogeny and survey of introgression revealed that gene flow has been a relatively common  
518 feature across the evolutionary history of *Drosophila*. Yet, identifying the specific consequences  
519 of introgression on fitness and the evolution of species and entire radiations within *Drosophila*  
520 and other systems remains a major challenge. Future research could combine the power of  
521 phylogenomic inference with population-level sampling to detect segregating introgression  
522 between sister species to further our understanding of the amount, timing, and fitness  
523 consequences of admixture for diversification.

524

525

526

## 527 **METHOD DETAILS**

### 528 **Genome assemblies and public data**

529           Genome sequences used by this work were obtained from concurrent projects and public  
530 databases. Genome sequencing and assembly for 84 genomes is described in<sup>62</sup>. These data are  
531 available for download at NCBI BioProject PRJNA675888. For the remaining genomes:  
532 sequencing and assembly of 8 Hawaiian *Drosophila* were provided by E. Armstrong and D.  
533 Price, described in Armstrong et al. (in prep) and available at NCBI BioProject PRJNA593822;  
534 sequences and/or assemblies of five *nannoptera* group species were provided by M. Lang and V.  
535 Courtier-Orgogozo and are available at NCBI BioProject PRJNA611543; 44 were downloaded  
536 as assembled sequences from NCBI GenBank; *Z. sepsoides* and *D. neohypocausta* were  
537 sequenced as paired-end 150bp reads on Illumina HiSeq 4000 at UNC and assembled using  
538 SPAdes v3.11.1 with default parameters<sup>103</sup>; and 15 were generated by assembling short read  
539 sequences downloaded from NCBI SRA. For sets of unassembled short reads, we used ABySS  
540 v2.2.3<sup>104</sup> with parameters “k=64” with paired-end reads (typically 100-150bp) to assemble the  
541 reads. Finally, outgroup genome sequences (*A. gambiae*, *M. domestica*, *L. trifolii*, *C. hians*, and  
542 *E. gracilis*) were obtained from NCBI GenBank. See Data S3 for a full list of samples, strain  
543 information, accessions, and associated publications.

544

### 545 **Orthology Inference**

546           We identified single-copy orthologous genes in each genome using BUSCO  
547 (Benchmarking Universal Single-Copy Orthologs; v3.1.0<sup>98</sup>). BUSCO was run with orthologs  
548 from the Diptera set in OrthoDB v.9 (odb9) using default parameters. For each species, all  
549 BUSCOs found in a single copy were used for phylogenetic analysis.

550

### 551 **Assignment of BUSCO genes to Muller elements for *obscura* group species**

552           Each of the BUSCO genes identified as single-copy in each of the group 12 (*obscura*  
553 group: *D. affinis*, *D. athabasca*, *D. azteca*, *D. bifasciata*, *D. guanache*, *D. lowei*, *D. miranda*, *D.*  
554 *obscura*, *D. persimilis*, *D. pseudoobscura*, *D. subobscura*) genome assemblies was assigned to  
555 one of the six Muller elements (elements A-F). For *D. athabasca*, *D. bifasciata*, *D. lowei*, *D.*  
556 *miranda*, *D. pseudoobscura*, and *D. subobscura*, contig/scaffold associations with chromosomes  
557 and/or Muller elements were simply obtained from NCBI GenBank assembly report tables. For

558 the remaining genomes (*D. affinis*, *D. azteca*, *D. guanche*, *D. obscura*, *D. persimilis*), we used  
559 whole-genome alignments to infer the Muller element associated with each contig or scaffold.  
560 Using the Progressive Cactus<sup>105</sup> software, each remaining genome was aligned to a closely  
561 related reference genome (*D. affinis* - *D. athabasca*; *D. azteca* - *D. athabasca*; *D. guanche* - *D.*  
562 *subobscura*; *D. obscura* - *D. bifasciata*; *D. persimilis* - *D. miranda*) with a similar  
563 karyotype<sup>54,106</sup>. Using the reference genomes as backbones, each remaining genome was then  
564 scaffolded, with Ragout<sup>107</sup>. The scaffolds allowed us to annotate each contig in the remaining  
565 genomes with Muller element information from the reference genomes (see Data S4). BUSCO  
566 genes on unplaced contigs were ignored.

567

### 568 **Phylogenetic reconstruction**

569 Every DNA BUSCO locus was aligned with MAFFT v7.427<sup>100</sup> using the L-INS-i  
570 method. We removed sites that had fewer than three non-gap characters from the resulting  
571 multiple sequence alignments (MSAs). These trimmed MSAs were concatenated to form a  
572 supermatrix. To assess the quality of the assembled supermatrices we computed pairwise  
573 completeness scores in AliStat<sup>108</sup> (Figure S5). We inferred a maximum likelihood (ML)  
574 phylogenetic tree from the supermatrix (a.k.a. concatenated alignment) using IQ-TREE v1.6.5<sup>99</sup>,  
575 and treated the supermatrix as a single partition. IQ-TREE was run under GTR+I+G substitution  
576 model, as inference under any other substitution model will not necessarily lead to better  
577 accuracy of tree topology estimation<sup>109</sup>. To estimate the support for each node in this tree, we  
578 used three different reliability measures. We did 1,000 ultrafast bootstrap (UFBoot) replicates<sup>110</sup>  
579 and additionally performed an approximate likelihood ratio test with the nonparametric  
580 Shimodaira–Hasegawa correction (SH-aLRT) and a Bayesian-like transformation of aLRT<sup>111</sup>.  
581 We used the ML gene trees obtained by IQ-TREE with a GTR+I+G substitution model for tree  
582 inference in ASTRAL<sup>96</sup>. For the estimated ASTRAL tree we calculated the support of each node  
583 using local posterior probabilities (LPP)<sup>96</sup>. Also, we created a gene tree set by removing taxa  
584 with outlier branch lengths that were potentially produced by misaligned regions and/or incorrect  
585 orthology inference in TreeShrink<sup>45</sup> under default parameters. This analysis resulted in a small  
586 fraction of branches removed from our gene tree set (<5.5%)

587 We did two additional analyses to verify the robustness of our topology inference. First,  
588 we inferred an ML tree using WAG+I+G substitution model from the protein supermatrix

589 obtained from concatenation of protein BUSCO MSAs. MSAs based on amino acid sequences  
590 have been shown to have superior accuracy to DNA MSAs for distantly related species<sup>112</sup>.  
591 Second, to verify that long branch attraction did not distort our tree topology, we inferred an ML  
592 tree under a GTR+I+G substitution model using a different set of outgroup species from the  
593 DNA supermatrix. Specifically, instead of distantly related *Anopheles gambiae*, we used *Musca*  
594 *domestica*, *Liriomyza trifolii*, *Curricula hians* and *Ephydra gracilis* together as our outgroup  
595 species.

596

### 597 **Phylogenetic Support Analysis via Quartet Sampling**

598 We used quartet sampling (QS) as an additional approach to estimate phylogenetic  
599 support<sup>11</sup>. Briefly, QS provides three scores for internal nodes: (i) quartet concordance (QC),  
600 which gives an estimate of how sampled quartet topologies agree with the putative species tree;  
601 (ii) quartet differential (QD) which estimates frequency skewness of the discordant quartet  
602 topologies, and can be indicative of introgression if a skewed frequency observed, and (iii)  
603 quartet informativeness (QI) which quantifies how informative sampled quartets are by  
604 comparing likelihood scores of alternative quartet topologies. Finally, QS provides a score for  
605 terminal nodes, quartet fidelity (QF), which measures a taxon “rogueness”. We did QS analysis  
606 using the DNA BUSCO supermatrix described above, specifying an IQ-TREE engine for quartet  
607 likelihood calculations with 100 replicates (i.e. number of quartet draws per focal branch).

608

### 609 **Fossil Dating**

610 *MCMCTREE*: We implemented the Bayesian algorithm of MCMCTree v4.9h<sup>46</sup> with  
611 approximate likelihood computation to estimate divergence times within *Drosophila* using  
612 several calibration schemes (Data S1). First, we estimated branch lengths by ML and then the  
613 gradient and Hessian matrices around these ML estimates in MCMCTree using the DNA  
614 supermatrix and species tree topology estimated by IQ-TREE. Because large amounts of  
615 sequence data are not essential for accurate fossil calibration<sup>113</sup>, we performed dating analysis  
616 using a random sample of 1,000 MSA loci (out of 2,791) for the sake of computational  
617 efficiency. Thus, for this analysis the supermatrix was generated by concatenating 1,000  
618 randomly selected gene-specific MSAs. Using fewer loci (10 and 100) for fossil calibration did  
619 not drastically affect nodal age estimation (Figure S1). We removed sites that had less than 80



620 non-gap characters from all these supermatrices. Second, we used the gradient and Hessian  
621 matrix, which constructs an approximate likelihood function by Taylor expansion<sup>114</sup>, to perform  
622 fossil calibration in MCMC framework. For this step we specified a GTR+G substitution model  
623 with four gamma categories; birth, death and sampling parameters of 1, 1 and 0.1, respectively.  
624 To model rate variation we used an uncorrelated relaxed clock. To ensure convergence, the  
625 analysis was run ten times independently for  $8 \times 10^6$  generations (first  $10^6$  generations were  
626 discarded as burn-in), logging every 1,000 generations. We used the R package MCMCtreeR<sup>101</sup>  
627 to visualize the calibrated tree.

628 *BEAST 2*: Additionally we performed fossil calibration using the Fossilized Birth-Death  
629 (FBD) process<sup>47</sup> as implemented in the Bayesian framework of BEAST 2.6.3<sup>48</sup>. For scalability  
630 purposes, we randomly selected 1,000 loci and then partitioned them into 10 supermatrices each  
631 consistent of 100 different MSAs. Each of these 10 datasets was treated as a single partition in  
632 the downstream analyses. Additionally, we removed sites that had less than 128 non-gap  
633 characters from all these supermatrices. To perform fossil calibration, we used a GTR+G model  
634 with four gamma categories, and an optimized relaxed clock<sup>115</sup> was used to model rate  
635 variation. For the FBD prior we specified an initial origin value of 230 Mya (which corresponds  
636 to the age of oldest known dipteran fossil *Grauvogelia*), and the tree likelihood was conditioned  
637 on the proportion of species sampled at present ( $\rho = 0.1$ ). The remaining priors were set to their  
638 defaults. In order to directly compare divergence time estimation between BEAST 2 and  
639 MCMCTree, we used the same fixed IQ-TREE species tree topology with several exceptions.  
640 First, we did not fix the phylogenetic positions of contemporary *Scaptomyza* species and fossil  
641 taxon *Scaptomyza dominicana* within its monophyletic group. Second, we did not constrain  
642 relationships of outgroup species *L. varia*, *C. costata*, *S. lebanonensis* including fossil taxon  
643 *Electrophortica succini*. Two additional fossils, *Oligophryne* and *Phytomyzites*, were specified  
644 for Drosophilidae stem. Furthermore, to accommodate uncertainty of fossil dates we incorporated  
645 age ranges for several fossils (Data S1). For each of the 10 datasets we ran 2 independent  
646 MCMC chains for  $6 \times 10^8$  generations with sampling frequency of 10,000 for each model  
647 parameter. Additionally, we performed sampling from the prior distribution only. Convergence  
648 was assessed using ESS in Tracer<sup>102</sup>. Divergence times were generated by taking means of  
649 posterior nodal ages discarding 25% of the sampled trees as burn-in in TreeAnnotator for each  
650 dataset. To drastically improve computational efficiency of likelihood calculations in all BEAST

651 2 analyses we used the program in conjunction with BEAGLE library<sup>97</sup> that enables GPU  
652 utilization.

653

## 654 **Inferring Introgression Across the Tree**

655 *Gene tree-based methods:* In order to detect patterns of introgression we used three  
656 different methods that rely on the topologies of gene trees, and the distributions of their  
657 corresponding branch lengths, for triplets of species. If the true species tree is ((A, B), C), these  
658 tests are able to detect cases of introgression between A and C, or between B and C. These  
659 include two of the methods that we devised for this study, and which use complementary pieces  
660 of information—the counts of loci supporting either discordant topology, and the branch-length  
661 distributions of gene trees supporting these topologies, respectively—to test an introgression-free  
662 null model.

663 The first method we developed was the discordant-count test (DCT), which compares the  
664 number of genes supporting each of the two possible discordant gene trees: ((A, C), B) or (A, (B,  
665 C)), similar in principle to the delta statistic from<sup>116</sup>. Genes may support the two discordant  
666 topologies (denoted  $T_1$  and  $T_2$ ) in the presence of ILS and/or in the presence of introgression. In  
667 the absence of ancestral population structure, gene genealogies from loci experiencing ILS will  
668 show either topology with equal probability; ILS alone is not expected to bias the count towards  
669 one of the topologies. In the presence of introgression, one of the two topologies will be more  
670 frequent than the other because the pair of species experiencing gene flow will be sister lineages  
671 at all introgressed loci (illustrated in Figure 2). For example, if there is introgression between A  
672 and C, there will be an excess of gene trees with the ((A, C), B) topology. The DCT identifies  
673 pairs of species that may have experienced introgression by performing a  $\chi^2$  goodness-of-fit test  
674 on the gene tree count values for a species triplet to determine whether their proportions  
675 significantly deviate from 0.5, the expected proportion for each gene genealogy under ILS. We  
676 used this test on all triplets extracted from BUSCO gene trees within each clade, and the  
677 resulting  $P$ -values were then corrected for multiple testing using the Benjamini-Hochberg  
678 procedure with a false discovery rate (FDR) cutoff of 0.05. We note that these tests are not  
679 independent since different triplets may contain overlapping taxa. Thus, while our correction  
680 results in more conservative tests<sup>57</sup>, the inferred FDRs may be somewhat inaccurate.

681           Second, we devised a branch-length test (BLT) to identify cases of introgression  
682 (illustrated in Figure 2). This test examines branch lengths to estimate the age of the most recent  
683 coalescence event (measured in substitutions per site). Introgression should result in more recent  
684 coalescences than expected under the concordant topology with complete lineage sorting, while  
685 ILS shows older coalescence events<sup>90</sup>. Importantly, ILS alone is not expected to result in  
686 different coalescence times between the two discordant topologies, and this forms the null  
687 hypothesis for the BLT. For a given triplet, for each gene tree we calculated the distance  $d$  (a  
688 proxy for the divergence time between sister taxa) by averaging the external branch lengths  
689 leading to the two sister taxa under that gene tree topology. We calculated  $d$  for each gene tree  
690 and denote values of  $d$  from the first discordant topology  $d_{T_1}$  and those from the second  
691 discordant topology  $d_{T_2}$ . We then compared the distributions of  $d_{T_1}$  and  $d_{T_2}$  using a Mann-  
692 Whitney  $U$  test. Under ILS alone the expectation is that  $d_{T_1} = d_{T_2}$ , while in the presence of  
693 introgression  $d_{T_1} < d_{T_2}$  (suggesting introgression consistent with discordant topology  $T_1$ ) or  $d_{T_1} >$   
694  $d_{T_2}$  (suggesting introgression with consistent with topology discordant  $T_2$ ). The BLT is  
695 conceptually similar to the D3 test<sup>117</sup>, which transforms the values of  $d_{T_1}$  and  $d_{T_2}$  in a manner  
696 similar to the  $D$  statistic for detecting introgression<sup>92</sup>. As with the DCT, we performed the BLT  
697 on all triplets within a clade and used a Benjamini-Hochberg correction with a false discovery  
698 rate cutoff (FDR) of 0.05. We note that both the DCT and BLT will be conservative in cases  
699 where, for a triplet ((A,B), C), there is introgression between A and C as well as B and C, with  
700 the extreme case of equal rates of introgression for both species pairs resulting in a complete loss  
701 of power.

702           Finally, we used QuIBL<sup>8</sup>, an analysis of branch-length distribution across gene trees to  
703 infer putative introgression patterns. Briefly, under coalescent theory internal branches of rooted  
704 gene trees for a set of 3 taxa (triplet) can be viewed as a mixture of two distributions: one that  
705 generates branch lengths under ILS, and the other under introgression/speciation. Thus, the  
706 estimated mixing proportions ( $\pi_1$  for ILS and  $\pi_2$  for introgression/speciation;  $\pi_1 + \pi_2 = 1$ ) of those  
707 distribution components show which fraction of the gene trees were generated through ILS or  
708 non-ILS processes. For a given triplet, QuIBL computes the proportion of gene trees that support  
709 the three alternative topologies. Then for every alternative topology QuIBL estimates mixing  
710 proportions along with other relevant parameters via Expectation-Maximization and computes  
711 Bayesian Information Criterion (BIC) scores for ILS-only and introgression models. For

712 concordant topologies elevated values of  $\pi_2$  are expected whereas for discordant ones  $\pi_2$  values  
713 significantly greater than zero are indicative of introgression. To identify significant cases of  
714 introgression here we used a cutoff of  $\Delta\text{BIC} < -30$  as in<sup>8</sup>. We ran QuIBL on every triplet  
715 individually under default parameters with the number of steps (the `numsteps` parameter) set  
716 to 50 and using *Anopheles gambiae* for triplet rooting; the branch length between *A. gambiae* and  
717 the triplet is not used for any of QuIBL's calculations.

718 We note that the DCT and BLT methods are potentially impacted by ancestral population  
719 structure: if the lineages leading to B and C were in subpopulations that were more likely to  
720 interbreed in the ancestral population, then the ((B, C), A) topology might be expected to be  
721 more prevalent than ((A, C), B), along with a shorter time back to the first coalescence.  
722 However, it is unclear how much of a concern ancestral population structure should be for this  
723 analysis, as it seems less likely that it would be a pair of lineages that diverged first (i.e. A and C  
724 or B and C) that interbred more frequently in the ancestral population instead of the two lineages  
725 that went on to be sister taxa (i.e. A and B). Nonetheless, plausible scenarios of ancestral  
726 structure supporting one discordant topology over the other can be devised (e.g. ref<sup>118</sup>). We  
727 therefore conducted a more stringent version of our DCT-BLT combined test that requires the  
728 average distance between the two introgressing taxa (when examining gene trees with the  
729 discordant topology consistent with introgression) to be less than that between the two sister  
730 species (when examining gene trees with the concordant topology). Such a pattern is consistent  
731 with introgression between non-sister species, which must occur more recently than the species  
732 split and therefore causing more recent coalescence events, but not with ancestral structure which  
733 will still result in older coalescence times for discordant trees than the concordant trees (because  
734 structure in the ancestral population is only a factor in the case of ILS). Note that this test is  
735 expected to be especially conservative because ILS, which for many triplets accounts for a  
736 sizable fraction of our discordant gene trees, will push the coalescent times for all discordant  
737 topologies back further in time.

738 We also examined the effect of evolutionary rate heterogeneity measured in branch-  
739 specific  $d_N/d_S$  values on introgression detection. To that end, we generated codon alignments for  
740 each BUSCO locus using TranslatorX<sup>119</sup> and then calculated  $d_N/d_S$  ratios for each gene tree in  
741 PAML<sup>46</sup> within each clade using a free-ratios branch model that assumes independent  $d_N/d_S$  for  
742 each gene tree branch. Then, we evaluated the distribution of  $d_N/d_S$  ratios across all gene trees to

743 determine the 95<sup>th</sup> percentile value of  $d_N/d_S$ . Thus, we repeated our DCT/BLT analyses for each  
744 triplet after excluding every gene tree that had at least one branch with  $d_N/d_S > 0.53$ . Note,  
745 branches with  $d_N/d_S$  values where  $d_S < 0.001$  or  $> 5$  were deemed unreliable and thus were  
746 excluded from calculation of a critical value or from downstream filtering. Additionally, we  
747 performed random filtering of gene trees to see if this procedure would have a similar impact on  
748 downstream introgression-detection as did our  $d_N/d_S$  filter. First, we estimated the distribution of  
749 proportions of gene trees retained for each triplet after applying the  $d_N/d_S$  filter. Then, for a  
750 given triplet, we randomly drew a number of genes to remove from the aforementioned  
751 distribution, and then applied our DCT-BLT method to this triplet after removing the selected  
752 number of genes. This process was repeated for each triplet tested in our main analysis to  
753 generate a randomly filtered set of DCT-BLT results for each of our 9 clades. We then repeated  
754 this entire process 1000 times and noted the average fraction of DCT-BLT results remaining  
755 significant after randomly filtering genes.

756 Our DCT-BLT test assumes that there is no recombination within loci and complete  
757 inter-locus independence—these assumptions are commonly made by introgression inference  
758 methods<sup>10,120,121</sup>. We note that intra-locus recombination may interfere with the signatures of  
759 introgression by reducing discordant topology counts (because even loci experiencing  
760 introgression will have non-introgressed segments), and similarly diluting branch-length  
761 signatures of introgression, thereby reducing the sensitivity of our DCT-BLT approach.  
762 Nevertheless, site-pattern-based approaches (e.g. HyDe, see below) are not affected by intra-  
763 locus recombination as they evaluate each site in an MSA independently.

764

765 *Site-pattern -based detection of introgression:* Signatures of introgression can be identified by  
766 investigating fractions of certain site patterns within MSAs of species quartets. One of the most  
767 widely used methods is based on the counts of ABBA-BABA site patterns (aka., Patterson's D  
768 statistic<sup>122</sup>). Here we used the hybridization model implemented in HyDe<sup>52</sup> that implements an  
769 alternative invariant-based statistic to test introgression and estimate the fraction of the  
770 introgressed genome ( $\gamma$ ). We ran HyDe analysis on each of the 9 clades using the entire  
771 supermatrix and in each case selected the quartet's outgroup from a sister clade. Additionally, to  
772 examine effects of outgroup choice, we ran HyDe analyses with a more distantly related  
773 outgroup, *Anopheles gambiae* for all clades. The resulting *P*-values for each quartet were

774 corrected for multiple testing using the Bonferroni method. To investigate an individual  
775 contribution of each BUSCO locus to introgression, we additionally ran HyDe using BUSCO  
776 MSAs with *Anopheles gambiae* outgroup. We note, however, in this case HyDe's power to  
777 detect introgression will be reduced, especially for short MSAs with <10,000 sites<sup>52</sup>. A complete  
778 summary for each BUSCO locus including introgression results from locus-specific HyDe and  
779 BLT/DCT analyses is included in Data S5.

780

781 *Placing introgression events on the phylogeny:* All the aforementioned methods can infer  
782 multiple correlated signatures of introgression especially when triplets/quartets share the same  
783 taxa. Thus it can be difficult to interpret these interdependent results. To alleviate this problem,<sup>20</sup>  
784 devised a simple heuristic metric called *f*-branch to disentangle and map introgression events  
785 detected in multiple correlated species pairs onto the tree. In the original formulation, *f*-branch  
786 examines multiple  $f_4$  statistics measured for each species pair and that quantify  $\gamma$ , the proportion  
787 of introgressed material for that pair. However, the calculation of the  $f_4$  statistic requires allele  
788 frequency measures within each sampled species. Thus, to calculate *f*-branch statistic, instead of  
789  $f_4$  we used the introgression proportion derived from DCT/BLT as follows:  $\gamma = \frac{dis_2 - dis_1}{con + dis_1 + dis_2}$ ,  
790 where *con*, *dis*<sub>1</sub> and *dis*<sub>2</sub> represent concordant and discordant counts of gene trees and *dis*<sub>1</sub> < *dis*<sub>2</sub>.  
791 To compute *f*-branch statistic from DCT/BLT's  $\gamma$  estimates and to visualize the results within  
792 each clade we used the `Dsuite` python package<sup>57</sup>.

793 `Dsuite` outputs a matrix of  $\gamma$  estimates that have been partially collapsed: on one axis of  
794 this matrix signals of introgression can appear on ancestral branches, but on the other axis only  
795 extant branches are shown. Thus, we manually further collapsed these signatures by  
796 parsimoniously assuming that if some lineage A showed evidence of introgression with multiple  
797 descendants of some other lineage B that is not ancestral to A, then we considered this to be  
798 caused by a single introgression event between A and B. Note that we did not require all  
799 descendants of lineage B to share this signature of introgression, and thus this approach could  
800 potentially undercount the number of introgression events and overestimate their ages.

801

802 *Phylogenetic networks:* Introgression generates instances of reticulate evolution such that purely  
803 bifurcating trees cannot adequately represent evolutionary history; phylogenetic networks have  
804 been shown to provide a better fit to describe these patterns<sup>123,124</sup>. We used PhyloNet<sup>58,59</sup> to

805 calculate likelihood scores for networks generated by placing a single reticulation event (node) in  
806 an exhaustive manner, i.e. connecting all possible branch pairs within a clade. Because full  
807 likelihood calculations with PhyloNet can be prohibitively slow for large networks, for each of  
808 clades 1 through 9 we selected a subsample of 10 species in a manner that preserves the overall  
809 species tree topology. No subsampling was performed for clade 3 which has fewer than 10  
810 species. Using these subsampled clade topologies, we formed all possible network topologies  
811 having a single reticulation node (with the exception of networks having reticulation nodes  
812 connecting sister taxa). Because PhyloNet takes gene trees as input, for each clade we  
813 subsampled each gene tree to include only the subset of 10 species selected for the PhyloNet  
814 analysis (or all species in the case of clade 3); any gene trees missing at least one of these species  
815 were omitted from the analysis. Finally, we used the GalGTProb program<sup>125</sup> of the PhyloNet  
816 suite to obtain a likelihood score for each network topology for each clade. We report networks  
817 with the highest likelihood scores.

818

#### 819 **Data and code availability**

820 The data and code produced during this study are publically available on GitHub  
821 ([https://github.com/SchriderLab/drosophila\\_phylogeny](https://github.com/SchriderLab/drosophila_phylogeny)) and FigShare  
822 ([dx.doi.org/10.6084/m9.figshare.13264697](https://doi.org/10.6084/m9.figshare.13264697)). Whole genome sequencing data generated for this  
823 study are available on NCBI (BioProject PRJNA675888, BioProject PRJNA593822, and  
824 BioProject PRJNA611543).

825

826 **Acknowledgements:** We thank M. Hahn, M. Turelli, A. Yassin, and M. Matschiner for helpful  
827 feedback on a previous draft, and M. Hibbins for sharing simulated gene trees. AS and DRS  
828 were supported by the NIH under award nos. R00HG008696 and R35GM138286. BYK was  
829 supported by the NIH under award no. F32GM135998. JW was supported by the NIH under  
830 award no. K01DK119582. DP, AAC were supported by NSF Dimensions of Biodiversity award  
831 1737752. DRM and ERRD were supported by NIH award R01GM121750. The funders had no  
832 role in study design, data collection and analysis, decision to publish, or preparation of the  
833 manuscript.

834 **Competing interests:** The authors declare that there is no conflict of interest

## 835 References:

- 836 1. Tusso, S., Nieuwenhuis, B.P.S., Sedlazeck, F.J., Davey, J.W., Jeffares, D.C., and Wolf,  
837 J.B.W. (2019). Ancestral Admixture Is the Main Determinant of Global Biodiversity in  
838 Fission Yeast. *Mol. Biol. Evol.* *36*, 1975–1989.
- 839 2. Eberlein, C., Hénault, M., Fijarczyk, A., Charron, G., Bouvier, M., Kohn, L.M., Anderson,  
840 J.B., and Landry, C.R. (2019). Hybridization is a recurrent evolutionary stimulus in wild  
841 yeast speciation. *Nat. Commun.* *10*, 923.
- 842 3. Leducq, J.-B., Nielly-Thibault, L., Charron, G., Eberlein, C., Verta, J.-P., Samani, P.,  
843 Sylvester, K., Hittinger, C.T., Bell, G., and Landry, C.R. (2016). Speciation driven by  
844 hybridization and chromosomal plasticity in a wild yeast. *Nat. Microbiol.* *1*, 15003.
- 845 4. Lamichhaney, S., Berglund, J., Almén, M.S., Maqbool, K., Grabherr, M., Martinez-Barrio,  
846 A., Promerová, M., Rubin, C.-J., Wang, C., Zamani, N., et al. (2015). Evolution of  
847 Darwin's finches and their beaks revealed by genome sequencing. *Nature* *518*, 371.
- 848 5. Racimo, F., Sankararaman, S., Nielsen, R., and Huerta-Sánchez, E. (2015). Evidence for  
849 archaic adaptive introgression in humans. *Nat. Rev. Genet.* *16*, 359–371.
- 850 6. Schumer, M., Xu, C., Powell, D.L., Durvasula, A., Skov, L., Holland, C., Blazier, J.C.,  
851 Sankararaman, S., Andolfatto, P., Rosenthal, G.G., et al. (2018). Natural selection interacts  
852 with recombination to shape the evolution of hybrid genomes. *Science* *360*, 656–660.
- 853 7. Vanderpool, D., Minh, B.Q., Lanfear, R., Hughes, D., Murali, S., Harris, R.A., Raveendran,  
854 M., Muzny, D.M., Hibbins, M.S., Williamson, R.J., et al. (2020). Primate phylogenomics  
855 uncovers multiple rapid radiations and ancient interspecific introgression. *PLOS Biol.* *18*,  
856 e3000954.
- 857 8. Edelman, N.B., Frandsen, P.B., Miyagi, M., Clavijo, B., Davey, J., Dikow, R.B., García-  
858 Accinelli, G., Belleghem, S.M.V., Patterson, N., Neafsey, D.E., et al. (2019). Genomic  
859 architecture and introgression shape a butterfly radiation. *Science* *366*, 594–599.
- 860 9. Turissini, D.A., and Matute, D.R. (2017). Fine scale mapping of genomic introgressions  
861 within the *Drosophila yakuba* clade. *PLOS Genet.* *13*, e1006971.
- 862 10. Lohse, K., Clarke, M., Ritchie, M.G., and Etges, W.J. (2015). Genome-wide tests for  
863 introgression between cactophilic *Drosophila*  
864 implicate a role of inversions during speciation. *Evolution* *69*, 1178–1190.
- 865 11. Pease, J.B., Brown, J.W., Walker, J.F., Hinchliff, C.E., and Smith, S.A. (2018). Quartet  
866 Sampling distinguishes lack of support from conflicting support in the green plant tree of  
867 life. *Am. J. Bot.* *105*, 385–403.
- 868 12. Pease, J.B., Haak, D.C., Hahn, M.W., and Moyle, L.C. (2016). Phylogenomics reveals three  
869 sources of adaptive variation during a rapid radiation. *PLOS Biol.* *14*, e1002379.
- 870 13. Rhymer, J.M., and Simberloff, D. (1996). Extinction by Hybridization and Introgression.  
871 *Annu. Rev. Ecol. Syst.* *27*, 83–109.
- 872 14. Taylor, S.A., and Larson, E.L. (2019). Insights from genomes into the evolutionary  
873 importance and prevalence of hybridization in nature. *Nat. Ecol. Evol.* *3*, 170–177.
- 874 15. Hedrick, P.W. (2013). Adaptive introgression in animals: examples and comparison to new  
875 mutation and standing variation as sources of adaptive variation. *Mol. Ecol.* *22*, 4606–4618.
- 876 16. Suarez-Gonzalez, A., Lexer, C., and Cronk, Q.C.B. (2018). Adaptive introgression: a plant  
877 perspective. *Biol. Lett.* *14*, 20170688.
- 878 17. Marques, D.A., Meier, J.I., and Seehausen, O. (2019). A Combinatorial View on Speciation  
879 and Adaptive Radiation. *Trends Ecol. Evol.* *34*, 531–544.



- 880 18. Meier, J.I., Marques, D.A., Mwaiko, S., Wagner, C.E., Excoffier, L., and Seehausen, O.  
881 (2017). Ancient hybridization fuels rapid cichlid fish adaptive radiations. *Nat. Commun.* 8,  
882 14363.
- 883 19. Li, G., Davis, B.W., Eizirik, E., and Murphy, W.J. (2016). Phylogenomic evidence for  
884 ancient hybridization in the genomes of living cats (Felidae). *Genome Res.* 26, 1–11.
- 885 20. Malinsky, M., Svardal, H., Tyers, A.M., Miska, E.A., Genner, M.J., Turner, G.F., and  
886 Durbin, R. (2018). Whole-genome sequences of Malawi cichlids reveal multiple radiations  
887 interconnected by gene flow. *Nat. Ecol. Evol.* 2, 1940–1955.
- 888 21. Svardal, H., Quah, F.X., Malinsky, M., Ngatunga, B.P., Miska, E.A., Salzburger, W.,  
889 Genner, M.J., Turner, G.F., and Durbin, R. (2020). Ancestral Hybridization Facilitated  
890 Species Diversification in the Lake Malawi Cichlid Fish Adaptive Radiation. *Mol. Biol.*  
891 *Evol.* 37, 1100–1113.
- 892 22. Chen, N., Cai, Y., Chen, Q., Li, R., Wang, K., Huang, Y., Hu, S., Huang, S., Zhang, H.,  
893 Zheng, Z., et al. (2018). Whole-genome resequencing reveals world-wide ancestry and  
894 adaptive introgression events of domesticated cattle in East Asia. *Nat. Commun.* 9, 2337.
- 895 23. Jones, M.R., Mills, L.S., Alves, P.C., Callahan, C.M., Alves, J.M., Lafferty, D.J.R., Jiggins,  
896 F.M., Jensen, J.D., Melo-Ferreira, J., and Good, J.M. (2018). Adaptive introgression  
897 underlies polymorphic seasonal camouflage in snowshoe hares. *Science* 360, 1355–1358.
- 898 24. Platt, R.N., McDew-White, M., Le Clec’h, W., Chevalier, F.D., Allan, F., Emery, A.M.,  
899 Garba, A., Hamidou, A.A., Ame, S.M., Webster, J.P., et al. (2019). Ancient Hybridization  
900 and Adaptive Introgression of an Invadysin Gene in Schistosome Parasites. *Mol. Biol.*  
901 *Evol.* 36, 2127–2142.
- 902 25. Richards, E.J., and Martin, C.H. (2017). Adaptive introgression from distant Caribbean  
903 islands contributed to the diversification of a microendemic adaptive radiation of trophic  
904 specialist pupfishes. *PLOS Genet.* 13, e1006919.
- 905 26. Turelli, M., Lipkowitz, J.R., and Brandvain, Y. (2014). On the Coyne and Orr-Igin of  
906 Species: Effects of Intrinsic Postzygotic Isolation, Ecological Differentiation, X  
907 Chromosome Size, and Sympatry on *Drosophila* Speciation. *Evolution* 68, 1176–1187.
- 908 27. Brand, C.L., Kingan, S.B., Wu, L., and Garrigan, D. (2013). A Selective Sweep across  
909 Species Boundaries in *Drosophila*. *Mol. Biol. Evol.* 30, 2177–2186.
- 910 28. Dyer, K.A., Bewick, E.R., White, B.E., Bray, M.J., and Humphreys, D.P. (2018). Fine-scale  
911 geographic patterns of gene flow and reproductive character displacement in *Drosophila*  
912 *subquinaria* and *Drosophila recens*. *Mol. Ecol.* 27, 3655–3670.
- 913 29. Garrigan, D., Kingan, S.B., Geneva, A.J., Andolfatto, P., Clark, A.G., Thornton, K.R., and  
914 Presgraves, D.C. (2012). Genome sequencing reveals complex speciation in the *Drosophila*  
915 *simulans* clade. *Genome Res.* 22, 1499–511.
- 916 30. Kang, L., Garner, H.R., Price, D.K., and Michalak, P. (2017). A Test for Gene Flow among  
917 Sympatric and Allopatric Hawaiian Picture-Winged *Drosophila*. *J. Mol. Evol.* 84, 259–266.
- 918 31. Mai, D., Nalley, M.J., and Bachtrog, D. (2020). Patterns of Genomic Differentiation in the  
919 *Drosophila nasuta* Species Complex. *Mol. Biol. Evol.* 37, 208–220.
- 920 32. Schrider, D.R., Ayroles, J., Matute, D.R., and Kern, A.D. (2018). Supervised machine  
921 learning reveals introgressed loci in the genomes of *Drosophila simulans* and *D. sechellia*.  
922 *PLOS Genet.* 14, e1007341.
- 923 33. Kao, J.Y., Lymer, S., Hwang, S.H., Sung, A., and Nuzhdin, S.V. (2015). Postmating  
924 reproductive barriers contribute to the incipient sexual isolation of the United States and  
925 Caribbean *Drosophila melanogaster*. *Ecol. Evol.* 5, 3171–3182.

- 926 34. Matute, D.R., and Ayroles, J.F. (2014). Hybridization occurs between *Drosophila simulans*  
927 and *D. sechellia* in the Seychelles archipelago. *J. Evol. Biol.* *27*, 1057–68.
- 928 35. Sawamura, K., Sato, H., Lee, C.-Y., Kamimura, Y., and Matsuda, M. (2016). A Natural  
929 Population Derived from Species Hybridization in the *Drosophila ananassae* Species  
930 Complex on Penang Island, Malaysia. *Zoolog. Sci.* *33*, 467–475.
- 931 36. Cooper, B.S., Sedghifar, A., Nash, W.T., Comeault, A.A., and Matute, D.R. (2018). A  
932 Maladaptive Combination of Traits Contributes to the Maintenance of a *Drosophila* Hybrid  
933 Zone. *Curr. Biol.* *28*, 2940-2947.e6.
- 934 37. Lachaise, D., Harry, M., Solignac, M., Lemeunier, F., Bénassi, V., and Cariou, M.L.  
935 (2000). Evolutionary novelties in islands: *Drosophila santomea*, a new melanogaster sister  
936 species from São Tomé. *Proc. R. Soc. Lond. B* *267*, 1487–1495.
- 937 38. Matute, D.R. (2010). Reinforcement of gametic isolation in *Drosophila*. *PLoS Biol.* *8*,  
938 e1000341.
- 939 39. Seppey, M., Manni, M., and Zdobnov, E.M. (2019). BUSCO: Assessing Genome Assembly  
940 and Annotation Completeness. In *Gene Prediction: Methods and Protocols Methods in*  
941 *Molecular Biology.*, M. Kollmar, ed. (Springer), pp. 227–245.
- 942 40. Waterhouse, R.M., Seppey, M., Simão, F.A., Manni, M., Ioannidis, P., Klioutchnikov, G.,  
943 Kriventseva, E.V., and Zdobnov, E.M. (2017). BUSCO applications from quality  
944 assessments to gene prediction and phylogenomics. *Mol. Biol. Evol.*
- 945 41. Pease, J.B., and Hahn, M.W. (2013). More Accurate Phylogenies Inferred from Low-  
946 Recombination Regions in the Presence of Incomplete Lineage Sorting. *Evolution* *67*,  
947 2376–2384.
- 948 42. O’Grady, P.M., and DeSalle, R. (2018). Phylogeny of the Genus *Drosophila*. *Genetics* *209*,  
949 1–25.
- 950 43. Russo, C.A.M., Mello, B., Frazão, A., and Voloch, C.M. (2013). Phylogenetic analysis and  
951 a time tree for a large drosophilid data set (Diptera: Drosophilidae). *Zool. J. Linn. Soc.* *169*,  
952 765–775.
- 953 44. Yassin, A. (2013). Phylogenetic classification of the Drosophilidae Rondani (Diptera): the  
954 role of morphology in the postgenomic era. *Syst. Entomol.* *38*, 349–364.
- 955 45. Mai, U., and Mirarab, S. (2018). TreeShrink: fast and accurate detection of outlier long  
956 branches in collections of phylogenetic trees. *BMC Genomics* *19*, 272.
- 957 46. Yang, Z. (2007). PAML 4: Phylogenetic analysis by maximum likelihood. *Mol. Biol. Evol.*  
958 *24*, 1586–1591.
- 959 47. Heath, T.A., Huelsenbeck, J.P., and Stadler, T. (2014). The fossilized birth–death process  
960 for coherent calibration of divergence-time estimates. *Proc. Natl. Acad. Sci.* *111*, E2957–  
961 E2966.
- 962 48. Bouckaert, R., Vaughan, T.G., Barido-Sottani, J., Duchêne, S., Fourment, M.,  
963 Gavryushkina, A., Heled, J., Jones, G., Kühnert, D., Maio, N.D., et al. (2019). BEAST 2.5:  
964 An advanced software platform for Bayesian evolutionary analysis. *PLOS Comput. Biol.*  
965 *15*, e1006650.
- 966 49. Obbard, D.J., Maclennan, J., Kim, K.-W., Rambaut, A., O’Grady, P.M., and Jiggins, F.M.  
967 (2012). Estimating Divergence Dates and Substitution Rates in the *Drosophila* Phylogeny.  
968 *Mol. Biol. Evol.* *29*, 3459–3473.
- 969 50. Tamura, K., Subramanian, S., and Kumar, S. (2004). Temporal Patterns of Fruit Fly  
970 (*Drosophila*) Evolution Revealed by Mutation Clocks. *Mol. Biol. Evol.* *21*, 36–44.
- 971 51. Izumitani, H.F., Kusaka, Y., Koshikawa, S., Toda, M.J., and Katoh, T. (2016).

- 972 Phylogeography of the Subgenus *Drosophila* (Diptera: Drosophilidae): Evolutionary  
973 History of Faunal Divergence between the Old and the New Worlds. *PLOS ONE* 11,  
974 e0160051.
- 975 52. Blischak, P.D., Chifman, J., Wolfe, A.D., and Kubatko, L.S. (2018). HyDe: A Python  
976 Package for Genome-Scale Hybridization Detection. *Syst. Biol.* 67, 821–829.
- 977 53. Hibbins, M., and Hahn, M. (2021). Phylogenomic approaches to detecting and  
978 characterizing introgression.
- 979 54. Bracewell, R., Chatla, K., Nalley, M.J., and Bachtrog, D. (2019). Dynamic turnover of  
980 centromeres drives karyotype evolution in *Drosophila*. *eLife* 8, e49002.
- 981 55. Magnacca, K.N., and Price, D.K. (2015). Rapid adaptive radiation and host plant  
982 conservation in the Hawaiian picture wing *Drosophila* (Diptera: Drosophilidae). *Mol.*  
983 *Phylogenet. Evol.* 92, 226–242.
- 984 56. Price, J.P., and Clague, D.A. (2002). How old is the Hawaiian biota? Geology and  
985 phylogeny suggest recent divergence. *Proc. R. Soc. B Biol. Sci.* 269, 2429–2435.
- 986 57. Malinsky, M., Matschiner, M., and Svoldal, H. (2021). Dsuite - Fast D-statistics and related  
987 admixture evidence from VCF files. *Mol. Ecol. Resour.* 21, 584–595.
- 988 58. Than, C., Ruths, D., and Nakhleh, L. (2008). PhyloNet: a software package for analyzing  
989 and reconstructing reticulate evolutionary relationships. *BMC Bioinformatics* 9, 322.
- 990 59. Wen, D., Yu, Y., Zhu, J., and Nakhleh, L. (2018). Inferring Phylogenetic Networks Using  
991 PhyloNet. *Syst. Biol.* 67, 735–740.
- 992 60. Throckmorton, L.H. (1975). The phylogeny, ecology, and geography of *Drosophila*. In  
993 *Handbook of Genetics*, Vol 3., R. C. King, ed. (Plenum Publishing Corp.), pp. 421–469.
- 994 61. Katoh, T., Tamura, K., and Aotsuka, T. (2000). Phylogenetic Position of the Subgenus  
995 *Lordiphosa* of the Genus *Drosophila* (Diptera: Drosophilidae) Inferred from Alcohol  
996 Dehydrogenase (*Adh*) Gene Sequences. *J. Mol. Evol.* 51, 122–130.
- 997 62. Kim, B.Y., Wang, J.R., Miller, D.E., Barmina, O., Delaney, E., Thompson, A., Comeault,  
998 A.A., Peede, D., D’Agostino, E.R.R., Pelaez, J., et al. (2020). Highly contiguous assemblies  
999 of 101 drosophilid genomes. *bioRxiv*, 2020.12.14.422775.
- 1000 63. Reis, M.D., and Yang, Z. (2013). The unbearable uncertainty of Bayesian divergence time  
1001 estimation. *J. Syst. Evol.* 51, 30–43.
- 1002 64. Yang, Z., and Rannala, B. (2006). Bayesian Estimation of Species Divergence Times Under  
1003 a Molecular Clock Using Multiple Fossil Calibrations with Soft Bounds. *Mol. Biol. Evol.*  
1004 23, 212–226.
- 1005 65. Matschiner, M. (2019). Selective Sampling of Species and Fossils Influences Age Estimates  
1006 Under the Fossilized Birth–Death Model. *Front. Genet.* 0.
- 1007 66. Meiklejohn, C.D., Landeen, E.L., Gordon, K.E., Rzatkiwicz, T., Kingan, S.B., Geneva,  
1008 A.J., Vedanayagam, J.P., Muirhead, C.A., Garrigan, D., Stern, D.L., et al. (2018). Gene  
1009 flow mediates the role of sex chromosome meiotic drive during complex speciation. *eLife*  
1010 7, e35468.
- 1011 67. Matute, D.R., Comeault, A.A., Earley, E., Serrato-Capuchina, A., Peede, D., Monroy-  
1012 Eklund, A., Huang, W., Jones, C.D., Mackay, T.F.C., and Coyne, J.A. (2020). Rapid and  
1013 Predictable Evolution of Admixed Populations Between Two *Drosophila* Species Pairs.  
1014 *Genetics* 214, 211–230.
- 1015 68. Wang, S., Nalley, M.J., Chatla, K., Aldaimalani, R., MacPherson, A., Wei, K., Corbett, R.,  
1016 Mai, D., and Bachtrog, D. (2021). Neo-sex chromosome evolution shapes sex-dependent  
1017 asymmetrical introgression barrier (Evolutionary Biology).

- 1018 69. Anderson, T.M., vonHoldt, B.M., Candille, S.I., Musiani, M., Greco, C., Stahler, D.R.,  
1019 Smith, D.W., Padhukasahasram, B., Randi, E., Leonard, J.A., et al. (2009). Molecular and  
1020 evolutionary history of melanism in North American gray wolves. *Science* 323, 1339–1343.
- 1021 70. Dasmahapatra, K.K. (2012). Heliconius genome supplementary information. *Nature*.
- 1022 71. Fishman, L., and Sweigart, A.L. (2018). When Two Rights Make a Wrong: The  
1023 Evolutionary Genetics of Plant Hybrid Incompatibilities. *Annu. Rev. Plant Biol.* 69, 707–  
1024 731.
- 1025 72. Maheshwari, S., and Barbash, D.A. (2011). The Genetics of Hybrid Incompatibilities.  
1026 *Annu. Rev. Genet.* 45, 331–355.
- 1027 73. Nosil, P., and Schluter, D. (2011). The genes underlying the process of speciation. *Trends*  
1028 *Ecol. Evol.* 26, 160–167.
- 1029 74. Baack, E.J., and Rieseberg, L.H. (2007). A genomic view of introgression and hybrid  
1030 speciation. *Curr. Opin. Genet. Dev.* 17, 513–518.
- 1031 75. Moran, B.M., Payne, C., Langdon, Q., Powell, D.L., Brandvain, Y., and Schumer, M.  
1032 (2020). The genetic consequences of hybridization. *ArXiv201204077 Q-Bio*.
- 1033 76. Harris, K., and Nielsen, R. (2016). The Genetic Cost of Neanderthal Introgression. *Genetics*  
1034 203, 881–891.
- 1035 77. Kim, B.Y., Huber, C.D., and Lohmueller, K.E. (2018). Deleterious variation shapes the  
1036 genomic landscape of introgression. *PLOS Genet.* 14, e1007741.
- 1037 78. Sachdeva, H., and Barton, N.H. (2018). Introgression of a Block of Genome Under  
1038 Infinitesimal Selection. *Genetics* 209, 1279–1303.
- 1039 79. Geraldes, A., Ferrand, N., and Nachman, M.W. (2006). Contrasting Patterns of  
1040 Introgression at X-Linked Loci Across the Hybrid Zone Between Subspecies of the  
1041 European Rabbit (*Oryctolagus cuniculus*). *Genetics* 173, 919–933.
- 1042 80. Payseur, B.A., Krenz, J.G., and Nachman, M.W. (2004). Differential Patterns of  
1043 Introgression Across the X Chromosome in a Hybrid Zone Between Two Species of House  
1044 Mice. *Evolution* 58, 2064–2078.
- 1045 81. Storchová, R., Reif, J., and Nachman, M.W. (2010). Female Heterogamety and Speciation:  
1046 Reduced Introgression of the Z Chromosome Between Two Species of Nightingales.  
1047 *Evolution* 64, 456–471.
- 1048 82. Hamlin, J.A.P., Hibbins, M.S., and Moyle, L.C. (2020). Assessing biological factors  
1049 affecting postspeciation introgression. *Evol. Lett.* 4, 137–154.
- 1050 83. Kronforst, M.R., Hansen, M.E.B., Crawford, N.G., Gallant, J.R., Zhang, W., Kulathinal,  
1051 R.J., Kapan, D.D., and Mullen, S.P. (2013). Hybridization Reveals the Evolving Genomic  
1052 Architecture of Speciation. *Cell Rep.*, 666–677.
- 1053 84. Martin, S.H., Davey, J.W., Salazar, C., and Jiggins, C.D. (2019). Recombination rate  
1054 variation shapes barriers to introgression across butterfly genomes. *PLOS Biol.* 17,  
1055 e2006288.
- 1056 85. Coyne, J.A., and Orr, H.A. (1997). “Patterns of speciation in *Drosophila*” revisited.  
1057 *Evolution* 51, 295–303.
- 1058 86. Coyne, J.A., and Orr, H.A. (1989). Patterns of speciation in *Drosophila*. *Evolution* 43, 362–  
1059 381.
- 1060 87. Serrato-Capuchina, A., Schwochert, T.D., Zhang, S., Roy, B., Peede, D., Koppelman, C.,  
1061 and Matute, D.R. (2020). Pure species discriminate against hybrids in the *Drosophila*  
1062 *melanogaster* species subgroup. *bioRxiv*, 2020.07.22.214924.
- 1063 88. Turissini, D.A., McGirr, J.A., Patel, S.S., David, J.R., and Matute, D.R. (2018). The Rate of

- 1064 Evolution of Postmating-Prezygotic Reproductive Isolation in *Drosophila*. *Mol. Biol. Evol.*  
1065 35, 312–334.
- 1066 89. Turissini, D.A., Comeault, A.A., Liu, G., Lee, Y.C.G., and Matute, D.R. (2017). The ability  
1067 of *Drosophila* hybrids to locate food declines with parental divergence. *Evolution* 71, 960–  
1068 973.
- 1069 90. Fontaine, M.C., Pease, J.B., Steele, A., Waterhouse, R.M., Neafsey, D.E., Sharakhov, I.V.,  
1070 Jiang, X., Hall, A.B., Catteruccia, F., Kakani, E., et al. (2015). Extensive introgression in a  
1071 malaria vector species complex revealed by phylogenomics. *Science* 347.
- 1072 91. Dasmahapatra, K.K., Walters, J.R., Briscoe, A.D., Davey, J.W., Whibley, A., Nadeau, N.J.,  
1073 Zimin, A.V., Hughes, D.S.T., Ferguson, L.C., Martin, S.H., et al. (2012). Butterfly genome  
1074 reveals promiscuous exchange of mimicry adaptations among species. *Nature* 487, 94–98.
- 1075 92. Green, R.E., Krause, J., Briggs, A.W., Maricic, T., Stenzel, U., Kircher, M., Patterson, N.,  
1076 Li, H., Zhai, W., Fritz, M.H.-Y., et al. (2010). A Draft Sequence of the Neandertal Genome.  
1077 *Science* 328, 710–722.
- 1078 93. Juric, I., Aeschbacher, S., and Coop, G. (2015). The Strength of Selection Against  
1079 Neanderthal Introgression. *PLoS Genet.* 12, e1006340.
- 1080 94. Durvasula, A., and Sankararaman, S. (2020). Recovering signals of ghost archaic  
1081 introgression in African populations. *Sci. Adv.* 6, eaax5097.
- 1082 95. Ottenburghs, J. (2020). Ghost Introgression: Spooky Gene Flow in the Distant Past.  
1083 *BioEssays* 42, 2000012.
- 1084 96. Sayyari, E., and Mirarab, S. (2016). Fast Coalescent-Based Computation of Local Branch  
1085 Support from Quartet Frequencies. *Mol. Biol. Evol.* 33, 1654–1668.
- 1086 97. Ayres, D.L., Darling, A., Zwickl, D.J., Beerli, P., Holder, M.T., Lewis, P.O., Huelsenbeck,  
1087 J.P., Ronquist, F., Swofford, D.L., Cummings, M.P., et al. (2012). BEAGLE: An  
1088 Application Programming Interface and High-Performance Computing Library for  
1089 Statistical Phylogenetics. *Syst. Biol.* 61, 170–173.
- 1090 98. Simão, F.A., Waterhouse, R.M., Ioannidis, P., Kriventseva, E.V., and Zdobnov, E.M.  
1091 (2015). BUSCO: assessing genome assembly and annotation completeness with single-copy  
1092 orthologs. *Bioinformatics* 31, 3210–3212.
- 1093 99. Nguyen, L.-T., Schmidt, H.A., von Haeseler, A., and Minh, B.Q. (2015). IQ-TREE: A Fast  
1094 and Effective Stochastic Algorithm for Estimating Maximum-Likelihood Phylogenies. *Mol.*  
1095 *Biol. Evol.* 32, 268–274.
- 1096 100. Katoh, K., Misawa, K., Kuma, K., and Miyata, T. (2002). MAFFT: a novel method for  
1097 rapid multiple sequence alignment based on fast Fourier transform. *Nucleic Acids Res.* 30,  
1098 3059–3066.
- 1099 101. Puttick, M.N. (2019). MCMCtreeR: functions to prepare MCMCtree analyses and visualize  
1100 posterior ages on trees. *Bioinformatics* 35, 5321–5322.
- 1101 102. Rambaut, A., Drummond, A.J., Xie, D., Baele, G., and Suchard, M.A. (2018). Posterior  
1102 Summarization in Bayesian Phylogenetics Using Tracer 1.7. *Syst. Biol.* 67, 901–904.
- 1103 103. Bankevich, A., Nurk, S., Antipov, D., Gurevich, A.A., Dvorkin, M., Kulikov, A.S., Lesin,  
1104 V.M., Nikolenko, S.I., Pham, S., Prjibelski, A.D., et al. (2012). SPAdes: A New Genome  
1105 Assembly Algorithm and Its Applications to Single-Cell Sequencing. *J. Comput. Biol.* 19,  
1106 455–477.
- 1107 104. Jackman, S.D., Vandervalk, B.P., Mohamadi, H., Chu, J., Yeo, S., Hammond, S.A., Jahesh,  
1108 G., Khan, H., Coombe, L., Warren, R.L., et al. (2017). ABySS 2.0: resource-efficient  
1109 assembly of large genomes using a Bloom filter. *Genome Res.* 27, 768–777.

- 1110 105. Armstrong, J., Hickey, G., Diekhans, M., Fiddes, I.T., Novak, A.M., Deran, A., Fang, Q.,  
1111 Xie, D., Feng, S., Stiller, J., et al. (2020). Progressive Cactus is a multiple-genome aligner  
1112 for the thousand-genome era. *Nature* 587, 246–251.
- 1113 106. Bracewell, R., and Bachtrog, D. (2020). Complex Evolutionary History of the Y  
1114 Chromosome in Flies of the *Drosophila obscura* Species Group. *Genome Biol. Evol.* 12,  
1115 494–505.
- 1116 107. Kolmogorov, M., Armstrong, J., Raney, B.J., Streeter, I., Dunn, M., Yang, F., Odom, D.,  
1117 Flicek, P., Keane, T.M., Thybert, D., et al. (2018). Chromosome assembly of large and  
1118 complex genomes using multiple references. *Genome Res.* 28, 1720–1732.
- 1119 108. Wong, T.K.F., Kalyaanamoorthy, S., Meusemann, K., Yeates, D.K., Misof, B., and Jermini,  
1120 L.S. (2020). A minimum reporting standard for multiple sequence alignments. *NAR*  
1121 *Genomics Bioinforma.* 2.
- 1122 109. Abadi, S., Azouri, D., Pupko, T., and Mayrose, I. (2019). Model selection may not be a  
1123 mandatory step for phylogeny reconstruction. *Nat. Commun.* 10, 934.
- 1124 110. Minh, B.Q., Nguyen, M.A.T., and von Haeseler, A. (2013). Ultrafast approximation for  
1125 phylogenetic bootstrap. *Mol. Biol. Evol.* 30, 1188–1195.
- 1126 111. Anisimova, M., Gil, M., Dufayard, J.-F., Dessimoz, C., and Gascuel, O. (2011). Survey of  
1127 Branch Support Methods Demonstrates Accuracy, Power, and Robustness of Fast  
1128 Likelihood-based Approximation Schemes. *Syst. Biol.* 60, 685–699.
- 1129 112. Bininda-Emonds, O.R. (2005). transAlign: using amino acids to facilitate the multiple  
1130 alignment of protein-coding DNA sequences. *BMC Bioinformatics* 6, 156.
- 1131 113. Anisimova, M. ed. (2012). *Evolutionary Genomics: Statistical and Computational Methods*,  
1132 Volume 2 (Springer Science+Business Media, LLC).
- 1133 114. dos Reis, M., and Yang, Z. (2011). Approximate likelihood calculation on a phylogeny for  
1134 Bayesian estimation of divergence times. *Mol. Biol. Evol.* 28, 2161–2172.
- 1135 115. Douglas, J., Zhang, R., and Bouckaert, R. (2021). Adaptive dating and fast proposals:  
1136 Revisiting the phylogenetic relaxed clock model. *PLOS Comput. Biol.* 17, e1008322.
- 1137 116. Huson, D.H., Klöpper, T., Lockhart, P.J., and Steel, M.A. (2005). Reconstruction of  
1138 Reticulate Networks from Gene Trees. In *Research in Computational Molecular Biology*  
1139 *Lecture Notes in Computer Science.*, S. Miyano, J. Mesirov, S. Kasif, S. Istrail, P. A.  
1140 Pevzner, and M. Waterman, eds. (Springer), pp. 233–249.
- 1141 117. Hahn, M.W., and Hibbins, M.S. (2019). A Three-Sample Test for Introgression. *Mol. Biol.*  
1142 *Evol.* 36, 2878–2882.
- 1143 118. Eriksson, A., and Manica, A. (2012). Effect of ancient population structure on the degree of  
1144 polymorphism shared between modern human populations and ancient hominins. *Proc.*  
1145 *Natl. Acad. Sci.* 109, 13956–13960.
- 1146 119. Abascal, F., Zardoya, R., and Telford, M.J. (2010). TranslatorX: multiple alignment of  
1147 nucleotide sequences guided by amino acid translations. *Nucleic Acids Res.* 38, W7–W13.
- 1148 120. Flouri, T., Jiao, X., Rannala, B., and Yang, Z. (2020). A Bayesian Implementation of the  
1149 Multispecies Coalescent Model with Introgression for Phylogenomic Analysis. *Mol. Biol.*  
1150 *Evol.* 37, 1211–1223.
- 1151 121. Hey, J., Chung, Y., Sethuraman, A., Lachance, J., Tishkoff, S., Sousa, V.C., and Wang, Y.  
1152 (2018). Phylogeny Estimation by Integration over Isolation with Migration Models. *Mol.*  
1153 *Biol. Evol.* 35, 2805–2818.
- 1154 122. Patterson, N., Moorjani, P., Luo, Y., Mallick, S., Rohland, N., Zhan, Y., Genschoreck, T.,  
1155 Webster, T., and Reich, D. (2012). Ancient Admixture in Human History. *Genetics* 192,

- 1156 1065–1093.  
1157 123. Huson, D.H., and Bryant, D. (2006). Application of Phylogenetic Networks in Evolutionary  
1158 Studies. *Mol. Biol. Evol.* 23, 254–267.  
1159 124. Solís-Lemus, C., Yang, M., and Ané, C. (2016). Inconsistency of Species Tree Methods  
1160 under Gene Flow. *Syst. Biol.* 65, 843–851.  
1161 125. Yu, Y., Degnan, J.H., and Nakhleh, L. (2012). The Probability of a Gene Tree Topology  
1162 within a Phylogenetic Network with Applications to Hybridization Detection. *PLOS Genet.*  
1163 8, e1002660.  
1164
